# Supplementary material for: Geographical Origin Does Not Modulate Pathogenicity or Response to Climatic Variables of Fusarium oxysporum Associated with Vascular Wilt on Asparagus
Source: MDPI journal article supplement (doi:10.3390/jof7121056), 2021-12-09
Supplement: s1 [file s1]

S1: Final alignments in FASTA format (TEF1A)

```
>fusarium_proliferatum_et1_gca_900067095
gcgattcgaaacgtgcctgctaccccgctcgagaccaaaaatTTTTGCGATATGACCGTAA
-TTTTTTGGTGGGGCACTTACCCCGCCACTCGAGCGATGAGCGCGTTTTGCGCTT--T
cctgtccacaacctcaatgagcgcattgtcacgtgtcaagcagcgactaaccattcgaca
ataggaagccgctgagctcggttaagggttccttcaagtacgcctgggttcttgacaagct
caaggccgagcgtgagcgtggtatcaccatcgatattgctctctggaagttcgagactcc
tcgtactatgtcacccgtcattggtatgttgtcgctcatacctcatcctact--tcctca
tactaacacatcattcagacgctcccggtcacccgtgatttcatcaaga
>fusarium_oxysporum_fo47_gca_000271705
acgactcgaaacgtgcccgtaccccgctcgagaccaaaaatTTTTGCAATATGACTGTAA
TTTTTTTTGGTGGGGCACTTACCCCGCCACTTGAGCGACGGGAGCGTTTTGCCCTCTTAAC
cattctcacaacctcaatgagtgcgtcgtcacgtgtcaagcagtcactaaccattcaaca
ataggaagccgctgagctcggttaagggttccttcaagtacgcctgggttcttgacaagct
caaggccgagcgtgagcgtggtatcaccatcgatattgctctctggaagttcgagactcc
tcgtactatgtcacccgtcattggtatgttgtcgctcatgcttcattctacttctcttcg
tacta--acatcactcagacgctcccggtcacccgtgatttcatcaaga
>GASP_2
acgactcgaaacgtgcccgtaccccgctcgagaccaagaatcttgcaatatgaccgttaa
-TTTTTTGGTGGGGCACTTACCCCGCCACTTGAGCGACGGGAGCGTTTTGCCCTCTTAAC
cattctcacaacctcaatgagtgcgtcgtcacgtgtcaagcagtcactaaccattcaaca
ataggaagccgctgagctcggttaagggttccttcaagtacgcctgggttcttgacaagct
caaggccgagcgtgagcgtggtatcaccatcgatattgctctctggaagttcgagactcc
tcgtactatgtcacccgtcattggtatgttgtcgctcatgcttcattctacttctcttcg
tacta--acatcactcagacgctcccggtcacccgtgatttcatcaaga
>GASP_3
acgactcgaaacgtgcccgtaccccgctcgagaccaaaaatTTTTGCAATATGACTGTAA
TTTTTTTTGGTGGGGCACTTACCCCGCCACTTGAGCGACGGGAGCGTTTTGCCCTCTTAAC
cattctcacaacctcaatgagtgcgtcgtcacgtgtcaagcagtcactaaccattcaaca
ataggaagccgctgagctcggttaagggttccttcaagtacgcctgggttcttgacaagct
caaggccgagcgtgagcgtggtatcaccatcgatattgctctctggaagttcgagactcc
tcgtactatgtcacccgtcattggtatgttgtcgctcatgcttcattctacttctcttcg
tacta--acatcactcagacgctcccggtcacccgtgatttcatcaaga
>GASP_4
acgactcgaaacgtgcccgtaccccgctcgagaccaaaaatTTTTGCAATATGACTGTAA
TTTTTTTTGGTGGGGCACTTACCCCGCCACTTGAGCGACGGGAGCGTTTTGCCCTCTT-AC
cattctcacaacctcaatgagtgcgtcgtcacgtgtcaagcagtcactaaccattcaaca
ataggaagccgctgagctcggttaagggttccttcaagtacgcctgggttcttgacaagct
caaggccgagcgtgagcgtggtatcaccatcgatattgctctctggaagttcgagactcc
tcgtactatgtcacccgtcattggtatgttgtcgctcatgcttcattctacttctcttcg
tacta--acatcactcagacgctcccggtcacccgtgatttcatcaaga
>GASP_5
-----aacgtgcccgtaccccgctcgagaccaaaaatTTTTGCAATATGACTGTAA
-TTTTTTGGTGGGGCACTTACCCCGCCACTTGAGCGACGGGAGCGTTTTGCCCTCTTAAC
cattctcacaacctcaatgagtgcgtcgtcacgtgtcaagcagtcactaaccattcaaca
ataggaagccgctgagctcggttaagggttccttcaagtacgcctgggttcttgacaagct
caaggccgagcgtgagcgtggtatcaccatcgatattgctctctggaagttcgagactcc
tcgtactatgtcacccgtcattggtatgttgtcgctcaagcttcattctacttctcttcg
tacta--acatcactcagacgctcccggtcacccgtgatttcatcaaga
>GASP_9
acgactcgaaacgtgcccgtaccccgctcgagaccaaaaatTTTTGCAATATGACTGTAA
TTTTTTTTGGTGGGGCACTTACCCCGCCACTTGAGCGACGGGAGCGTTTTGCCCTCTTAAC
cattctcacaacctcaatgagtgcgtcgtcacgtgtcaagcagtcactaaccattcaaca
ataggaagccgctgagctcggttaagggttccttcaagtacgcctgggttcttgacaagct
caaggccgagcgtgagcgtggtatcaccatcgatattgctctctggaagttcgagactcc
tcgtactatgtcacccgtcattggtatgttgtcgctcatgcttcattctacttctcttcg
tacta--acatcactcagacgctcccggtcacccgtgatttcatcaaga
>GA_1.2
acgactcgaaacgtgcccgtaccccgctcgagaccaagaatcttgcaatatgaccgttaa
-TTTTTTGGTGGGGCACTTACCCCGCCACTTGAGCGACGGGAGCGTTTTGCCCTCTTAAC
```

cattctcacaaacctcaatgagtgcgctcgtcacgtgtcaagcagtcactaaccattcaaca  
ataggaagccgctgagctcggttaagggttccttcaagtacgcctgggttcttgacaagct  
caaggccgagcgctgagcggttatcaccatcgatattgctctctggaagttcgagactcc  
tcgctactatgtcaccgctcattggtatggtgtcgctcatgcttcattctacttctcttcg  
tacta--acatcactcagacgctcccggtcaccgtgatttcatcaaga

>GA\_1.3

acgactcgaaacgtgcccgtacccccgctcgagaccaaaaaattttgcaatatgactgttaa  
tttttttgggtggggcacttaccgcccacttgagcgacgggagcggttgccctcttaac  
cattctcacaaacctcaatgagtgcgctcgtcacgtgtcaagcagtcactaaccattcaaca  
ataggaagccgctgagctcggttaagggttccttcaagtacgcctgggttcttgacaagct  
caaggccgagcgctgagcggttatcaccatcgatattgctctctggaagttcgagactcc  
tcgctactatgtcaccgctcattggtatggtgtcgctcatgcttcattctacttctcttcg  
tacta--acatcactcagacgctcccggtcaccgtgatttcatcaaga

>GA\_1.4

acgactcgaaacgtgcccgtacccccgctcgagaccaagaatcttgcaatatgaccgttaa  
-tttttttgggtggggcacttaccgcccacttgagcgacgggagcggttgccctcttaac  
cattctcacaaacctcaatgagtgcgctcgtcacgtgtcaagcagtcactaaccattcaaca  
ataggaagccgctgagctcggttaagggttccttcaagtacgcctgggttcttgacaagct  
caaggccgagcgctgagcggttatcaccatcgatattgctctctggaagttcgagactcc  
tcgctactatgtcaccgctcattggtatggtgtcgctcatgcttcattctacttctcttcg  
tacta--acatcactcagacgctcccggtcaccgtgatttcatcaaga

>GA\_10

acgactcgaaacgtgcccgtacccccgctcgagaccaagaatcttgcaatatgaccgttaa  
-tttttttgggtggggcacttaccgcccacttgagcgacgggagcggttgccctcttaac  
cattctcacaaacctcaatgagtgcgctcgtcacgtgtcaagcagtcactaaccattcaaca  
ataggaagccgctgagctcggttaagggttccttcaagtacgcctgggttcttgacaagct  
caaggccgagcgctgagcggttatcaccatcgatattgctctctggaagttcgagactcc  
tcgctactatgtcaccgctcattggtatggtgtcgctcatgcttcattctacttctcttcg  
tacta--acatcactcagacgctcccggtcaccgtgatttcatcaaga

>GA\_3.2

acgactcgaaacgtgcccgtacccccgctcgagaccaaaaaattttgcaatatgactgttaa  
tttttttgggtggggcacttaccgcccacttgagcgacgggagcggttgccctcttaac  
cattctcacaaacctcaatgagtgcgctcgtcacgtgtcaagcagtcactaaccattcaaca  
ataggaagccgctgagctcggttaagggttccttcaagtacgcctgggttcttgacaagct  
caaggccgagcgctgagcggttatcaccatcgatattgctctctggaagttcgagactcc  
tcgctactatgtcaccgctcattggtatggtgtcgctcatgcttcattctacttctcttcg  
tacta--acatcactcagacgctcccggtcaccgtgatttcatcaaga

>GA\_3.3

acgactcgaaacgtgcccgtacccccgctcgagaccaagaatcttgcaatatgaccgttaa  
-tttttttgggtggggcacttaccgcccacttgagcgacgggagcggttgccctcttaac  
cattctcacaaacctcaatgagtgcgctcgtcacgtgtcaagcagtcactaaccattcaaca  
ataggaagccgctgagctcggttaagggttccttcaagtacgcctgggttcttgacaagct  
caaggccgagcgctgagcggttatcaccatcgatattgctctctggaagttcgagactcc  
tcgctactatgtcaccgctcattggtatggtgtcgctcatgcttcattctacttctcttcg  
tacta--acatcactcagacgctcccggtcaccgtgatttcatcaaga

>GA\_3.5

acgactcgaaacgtgcccgtacccccgctcgagaccaagaatcttgcaatatgaccgttaa  
-tttttttgggtggggcacttaccgcccacttgagcgacgggagcggttgccctcttaac  
cattctcacaaacctcaatgagtgcgctcgtcacgtgtcaagcagtcactaaccattcaaca  
ataggaagccgctgagctcggttaagggttccttcaagtacgcctgggttcttgacaagct  
caaggccgagcgctgagcggttatcaccatcgatattgctctctggaagttcgagactcc  
tcgctactatgtcaccgctcattggtatggtgtcgctcatgcttcattctacttctcttcg  
tacta--acatcactcagacgctcccggtcaccgtgatttcatcaaga

>GA\_3.6

acgactcgaaacgtgcccgtacccccgctcgagaccaaaaaattttgcaatatgaccgttaa  
-tttttttgggtggggcacttaccgcccacttgagcgacgggagcggttgccctcttaac  
cattctcacaaacctcaatgagtgcgctcgtcacgtgtcaagcagtcactaaccattcaaca  
ataggaagccgctgagctcggttaagggttccttcaagtacgcctgggttcttgacaagct  
caaggccgagcgctgagcggttatcaccatcgatattgctctctggaagttcgagactcc  
tcgctactatgtcaccgctcattggtatggtgtcgctcatgcttcattctacttctcttcg  
tacta--acatcactcagacgctcccggtcaccgtgatttcatca---

>GA\_3.7

acgactcgaagcgtgcccgcgtaccccgctcgagaccaagaatcttgcaatatgaccgtaa  
-tttttttgggtggggcacttaccocgccacttgagcgacgggagcgtttgccctcttaac  
cattctcacaacctcaatgagtgcgctcgtcacgtgtcaagcagtcactaaccattcaaca  
ataggaagccgctgagctcggttaagggttccttcaagtacgcctgggttcttgacaagct  
caaggccgagcgtgagcgtggtatcaccatcgatattgctctctggaagtccgagactcc  
tcgctactatgtcaccgctcattggtatgttgctcgctcatgcttcattctacttctcttcg  
tacta--acatcactcagacgctcccggtcaccgtgatttcatcaaga

>GA\_4.1

acgactcgaagcgtgcccgcgtaccccgctcgagaccaagaatcttgcaatatgaccgtaa  
-tttttttgggtggggcacttaccocgccacttgagcgacgggagcgtttgccctcttaac  
cattctcacaacctcaatgagtgcgctcgtcacgtgtcaagcagtcactaaccattcaaca  
ataggaagccgctgagctcggttaagggttccttcaagtacgcctgggttcttgacaagct  
caaggccgagcgtgagcgtggtatcaccatcgatattgctctctggaagtccgagactcc  
tcgctactatgtcaccgctcattggtatgttgctcgctcatgcttcattctact--tcttcg  
tactaacatatcactcagacgctcccggtcaccgtgatttcatcaaga

>GA\_4.2

acgactcgaaacgtgcccgcgtaccccgctcgagaccaaaaaatcttgcaatatgactgttaa  
tttttttgggtggggcacttaccocgccacttgagcgacgggagcgtttgccctcttaac  
cattctcacaacctcaatgagtgcgctcgtcacgtgtcaagcagtcactaaccattcaaca  
ataggaagccgctgagctcggttaagggttccttcaagtacgcctgggttcttgacaagct  
caaggccgagcgtgagcgtggtatcaccatcgatattgctctctggaagtccgagactcc  
tcgctactatgtcaccgctcattggtatgttgctcgctcatgcttcattctacttctcttcg  
tacta--acatcactcagacgctcccggtcaccgtgatttcatcaaga

>GA\_4.3

acgactcgaagcgtgcccgcgtaccccgctcgagaccaagaatcttgcaatatgaccgtaa  
-tttttttgggtggggcacttaccocgccacttgagcgacgggagcgtttgccctcttaac  
cattctcacaacctcaatgagtgcgctcgtcacgtgtcaagcagtcactaaccattcaaca  
ataggaagccgctgagctcggttaagggttccttcaagtacgcctgggttcttgacaagct  
caaggccgagcgtgagcgtggtatcaccatcgatattgctctctggaagtccgagactcc  
tcgctactatgtcaccgctcattggtatgttgctcgctcatgcttcattctact--tcttcg  
tactaacatatcactcagacgctcccggtcaccgtgatttcatcaaga

>GA\_5.3

acgactcgaaacgtgcccgcgtaccccgctcgagaccaaaaaatcttgcaatatgactgttaa  
tttttttgggtggggcacttaccocgccacttgagcgacgggagcgtttgccctcttaac  
cattctcacaacctcaatgagtgcgctcgtcacgtgtcaagcagtcactaaccattcaaca  
ataggaagccgctgagctcggttaagggttccttcaagtacgcctgggttcttgacaagct  
caaggccgagcgtgagcgtggtatcaccatcgatattgctctctggaagtccgagactcc  
tcgctactatgtcaccgctcattggtatgttgctcgctcatgcttcattctacttctcttcg  
tacta--acatcactcagacgctcccggtcaccgtgatttcatcaaga

>GA\_5.4

acgactcgaaacgtgcccgcgtaccccgctcgagaccaaaaaatcttgcaatatgactgttaa  
tttttttgggtggggcacttaccocgccacttgagcgacgggagcgtttgccctcttaac  
cattctcacaacctcaatgagtgcgctcgtcacgtgtcaagcagtcactaaccattcaaca  
ataggaagccgctgagctcggttaagggttccttcaagtacgcctgggttcttgacaagct  
caaggccgagcgtgagcgtggtatcaccatcgatattgctctctggaagtccgagactcc  
tcgctactatgtcaccgctcattggtatgttgctcgctcatgcttcattctacttctcttcg  
tacta--acatcactcagacgctcccggtcaccgtgatttcatcaaga

>GA\_92.3

acgactcgaaacgtgcccgcgtaccccgctcgagaccaaaaaatcttgcaatatgactgttaa  
tttttttgggtggggcacttaccocgccacttgagcgacgggagcgtttgccctcttaac  
cattctcacaacctcaatgagtgcgctcgtcacgtgtcaagcagtcactaaccattcaaca  
ataggaagccgctgagctcggttaagggttccttcaagtacgcctgggttcttgacaagct  
caaggccgagcgtgagcgtggtatcaccatcgatattgctctctggaagtccgagactcc  
tcgctactatgtcaccgctcattggtatgttgctcgctcatgcttcattctacttctcttcg  
tacta--acatcactcagacgctcccggtcaccgtgatttcatcaaga

>GA\_99.2

acgactcgaaacgtgcccgcgtaccccgctcgagaccaaaaaatcttgcaatatgactgttaa  
tttttttgggtggggcacttaccocgccacttgagcgacgggagcgtttgccctcttaac  
cattctcacaacctcaatgagtgcgctcgtcacgtgtcaagcagtcactaaccattcaaca  
ataggaagccgctgagctcggttaagggttccttcaagtacgcctgggttcttgacaagct

caaggccgagcgtgagcgtggtatcaccatcgatattgctctctggaagttcgagactcc  
tcgctactatgtcaccgctcattggtatggtgtcgctcatgcttcattctacttctcttcg  
tacta--acatcactcagacgctcccggtcaccgtgatttcatcaaga

>NL\_FOA01

acgactcgaaacgtgcccgtacccccgctcgagaccaaaaaattttgcaatatgaccgtaa  
-tttttttgggtggggcacttaccocgccacttgagcgacgggagcgtttgccctcttaac  
cattctcagaacctcaatgagtgcgctcgtcacgtgtcaagcagtcactaaccattcaaca  
ataggaagccgctgagctcggttaagggttccttcaagtacgcctgggttcttgacaagct  
caaggccgagcgtgagcgtggtatcaccatcgatattgctctctggaagttcgagactcc  
tcgctactatgtcaccgctcattggtatggtgtcgctcatgcttcattctacttctcttcg  
tacta--acatcactcagacgctcccggtcaccgtgatttcatcaaga

>NL\_FOA02

acgactcgaaacgtgcccgtacccccgctcgagaccaaaaaattttgcaatatgaccgtaa  
-tttttttgggtggggcacttaccocgccacttgagcgacgggagcgtttgccctcttaac  
cattctcagaacctcaatgagtgcgctcgtcacgtgtcaagcagtcactaaccattcaaca  
ataggaagccgctgagctcggttaagggttccttcaagtacgcctgggttcttgacaagct  
caaggccgagcgtgagcgtggtatcaccatcgatattgctctctggaagttcgagactcc  
tcgctactatgtcaccgctcattggtatggtgtcgctcatgcttcattctacttctcttcg  
tacta--acatcactcagacgctcccggtcaccgtgatttcatcaaga

>NL\_FOA03

acgactcgaaacgtgcccgtacccccgctcgagaccaaaaaattttgcaatatgaccgtaa  
-tttttttgggtggggcacttaccocgccacttgagcgacgggagcgtttgccctcttaac  
cattctcacaacctcaatgagtgcgctcgtcacgtgtcaagcagtcactaaccattcaaca  
ataggaagccgctgagctcggttaagggttccttcaagtacgcctgggttcttgacaagct  
caaggccgagcgtgagcgtggtatcaccatcgatattgctctctggaagttcgagactcc  
tcgctactatgtcaccgctcattggtatggtgtcgctcatgcttcattctacttctcttcg  
tacta--acatcactcagacgctcccggtcaccgtgatttcatcaaga

>NL\_FOA04

acgactcgaaacgtgcccgtacccccgctcgagaccaaaaaattttgcaatatgaccgtaa  
tttttttgggtggggcacttaccocgccacttgagcgacgggagcgtttgccctcttaac  
cattctcacaacctcaatgagtgcgctcgtcacgtgtcaagcagtcactaaccattcaaca  
ataggaagccgctgagctcggttaagggttccttcaagtacgcctgggttcttgacaagct  
caaggccgagcgtgagcgtggtatcaccatcgatattgctctctggaagttcgagactcc  
tcgctactatgtcaccgctcattggtatggtgtcgctcatgcttcattctacttctcttcg  
tacta--acatcactcagacgctcccggtcaccgtgatttcatcaaga

>NL\_FOA05

acgactcgaaacgtgcccgtacccccgctcgagaccaaaaaattttgcaatatgaccgtaa  
tttttttgggtggggcacttaccocgccacttgagcgacgggagcgtttgccctcttaac  
cattctcagaacctcaatgagtgcgctcgtcacgtgtcaagcagtcactaaccattcaaca  
ataggaagccgctgagctcggttaagggttccttcaagtacgcctgggttcttgacaagct  
caaggccgagcgtgagcgtggtatcaccatcgatattgctctctggaagttcgagactcc  
tcgctactatgtcaccgctcattggtatggtgtcgctcatgcttcattctacttctcttcg  
tacta--acatcactcagacgctcccggtcaccgtgatttcatcaaga

>SP\_FOA01

acgactcgaagcgtgcccgtacccccgctcgagaccaagaatcttgcaatatgaccgtaa  
-tttttttgggtggggcacttaccocgccacttgagcgacgggagcgtttgccctcttaac  
cattctcacaacctcaatgagtgcgctcgtcacgtgtcaagcagtcactaaccattcaaca  
ataggaagccgctgagctcggttaagggttccttcaagtacgcctgggttcttgacaagct  
caaggccgagcgtgagcgtggtatcaccatcgatattgctctctggaagttcgagactcc  
tcgctactatgtcaccgctcattggtatggtgtcgctcatgcttcattctacttctcttcg  
tacta--acatcactcagacgctcccggtcaccgtgatttcatcaaga

>SP\_FOA02

acgactcgaaacgtgcccgtacccccgctcgagaccaaaaaattttgcaatatgactgtaa  
tttttttgggtggggcacttaccocgccacttgagcgacgggagcgtttgccctcttaac  
cattctcacaacctcaatgagtgcgctcgtcacgtgtcaagcagtcactaaccattcaaca  
ataggaagccgctgagctcggttaagggttccttcaagtacgcctgggttcttgacaagct  
caaggccgagcgtgagcgtggtatcaccatcgatattgctctctggaagttcgagactcc  
tcgctactatgtcaccgctcattggtatggtgtcgctcatgcttcattctacttctcttcg  
tacta--acatcactcagacgctcccggtcaccgtgatttcatcaaga

>SP\_FOA03

acgactcgaagcgtgcccgtacccccgctcgagaccaagaatcttgcaatatgaccgtaa



tacta--acatcactcagacgctccccggtcaccgtgatttcatcaaga  
>SP\_FOA11  
acgactcgaaacgtgccccgctacccccgctcgagaccaaaaaattttgcaatatgaccgttaa  
tttttttgggtggggcacttaccocgccacttgagcgacgggagcggttgccctcttaac  
cattctcacaacctcaatgagtgcgtcgtcacgtgtcaagcagtcactaaccattcaaca  
ataggaagccgctgagctcggtaagggttccttcaagtacgcctgggttcttgacaagct  
caaggccgagcgtgagcgtggtatcaccatcgatattgctctctggaagtccgagactcc  
tcgctactatgtcaccgtcattggtatgttgtcgctcatgcttcattctacttctcttcg  
tacta--acatcactcagacgctccccggtcaccgtgatttcatcaaga  
>SP\_FOA12  
acgactcgaaatgtgccccgctacccccgctcgagaccaaaaaattttgcaatatgaccgttaa  
tttttttgggtggggcacttaccocgccacttgagcgacgggagcggttgccctcttaac  
cattctcacaacctcaatgagtgcgtcgtcacgtgtcaagcagtcactaaccattcaaca  
ataggaagccgctgagctcggtaagggttccttcaagtacgcctgggttcttgacaagct  
caaggccgagcgtgagcgtggtatcaccatcgatattgctctctggaagtccgagactcc  
tcgctactatgtcaccgtcattggtatgttgtcgctcatgcttcattctacttctcttcg  
tacta--acatcactcagacgctccccggtcaccgtgatttcatcaaga  
>SP\_FOA13  
acgactcgaaatgtgccccgctacccccgctcgagaccaaaaaattttgcaatatgaccgttaa  
tttttttgggtggggcacttaccocgccacttgagcgacgggagcggttgccctcttaac  
cattctcacaacctcaatgagtgcgtcgtcacgtgtcaagcagtcactaaccattcaaca  
ataggaagccgctgagctcggtaagggttccttcaagtacgcctgggttcttgacaagct  
caaggccgagcgtgagcgtggtatcaccatcgatattgctctctggaagtccgagactcc  
tcgctactatgtcaccgtcattggtatgttgtcgctcatgcttcattctacttctcttcg  
tacta--acatcactcagacgctccccggtcaccgtgatttcatcaaga  
>SP\_FOA14  
acgactcgaaagcgtgccccgctacccccgctcgagaccaaaaaattttgcaatatgaccgttaa  
tttttttgggtggggcacttaccocgccacttgagcgacgggagcggttgccctcttaac  
cattctcacaacctcaatgagtgcgtcgtcacgtgtcaagcagtcactaaccattcaaca  
ataggaagccgctgagctcggtaagggttccttcaagtacgcctgggttcttgacaagct  
caaggccgagcgtgagcgtggtatcaccatcgatattgctctctggaagtccgagactcc  
tcgctactatgtcaccgtcattggtatgttgtcgctcatgcttcattctacttctcttcg  
tacta--acatcactcagacgctccccggtcaccgtgatttcatcaaga  
>SP\_FOA15  
acgactcgaaacgtgccccgctacccccgctcgagaccaaaaaattttgcaatatgactgttaa  
tttttttgggtggggcacttaccocgccacttgagcgacgggagcggttgccctcttaac  
cattctcacaacctcaatgagtgcgtcgtcacgtgtcaagcagtcactaaccattcaaca  
ataggaagccgctgagctcggtaagggttccttcaagtacgcctgggttcttgacaagct  
caaggccgagcgtgagcgtggtatcaccatcgatattgctctctggaagtccgagactcc  
tcgctactatgtcaccgtcattggtatgttgtcgctcatgcttcattctacttctcttcg  
tacta--acatcactcagacgctccccggtcaccgtgatttcatcaaga  
>SP\_FOA16  
acgactcgaaacgtgccccgctacccccgctcgagaccaaaaaattttgcaatatgactgttaa  
tttttttgggtggggcacttaccocgccacttgagcgacgggagcggttgccctcttaac  
cattctcacaacctcaatgagtgcgtcgtcacgtgtcaagcagtcactaaccattcaaca  
ataggaagccgctgagctcggtaagggttccttcaagtacgcctgggttcttgacaagct  
caaggccgagcgtgagcgtggtatcaccatcgatattgctctctggaagtccgagactcc  
tcgctactatgtcaccgtcattggtatgttgtcgctcatgcttcattctacttctcttcg  
tacta--acatcactcagacgctccccggtcaccgtgatttcatcaaga  
>SP\_FOA17  
acgactcgaaacgtgccccgctacccccgctcgagaccaaaaaattttgcaatatgactgttaa  
tttttttgggtggggcacttaccocgccacttgagcgacgggagcggttgccctcttaac  
cattctcacaacctcaatgagtgcgtcgtcacgtgtcaagcagtcactaaccattcaaca  
ataggaagccgctgagctcggtaagggttccttcaagtacgcctgggttcttgacaagct  
caaggccgagcgtgagcgtggtatcaccatcgatattgctctctggaagtccgagactcc  
tcgctactatgtcaccgtcattggtatgttgtcgctcatgcttcattctacttctcttcg  
tacta--acatcactcagacgctccccggtcaccgtgatttcatcaaga  
>SP\_FOA18  
acgactcgaaacgtgccccgctacccccgctcgagaccaaaaaattttgcaatatgactgttaa  
tttttttgggtggggcacttaccocgccacttgagcgacgggagcggttgccctcttaac  
cattctcacaacctcaatgagtgcgtcgtcacgtgtcaagcagtcactaaccattcaaca

```

ataggaagccgctgagctcggttaaggggttccttcaagtacgcctgggttcttgacaagct
caaggccgagcgtgagcgtggtatcaccatcgatattgctctctggaagttcgagactcc
tcgctactatgtcaccgctcattggtatggtgctcgtcatgcttcattctacttctcttcg
tacta--acatcactcagacgctcccggtcaccgtgatttcatcaaga
>SP_FOA19
acgactcgaaacgtgcccgtacccccgctcgagaccaaaaaattttgcaatatgactgtaa
tttttttgggtggggcacttaccgcccacttgagcgacgggagcggttgccctcttaac
cattctcacaacctcaatgagtgcgctcgtcacgtgtcaagcagtcactaaccattcaaca
ataggaagccgctgagctcggttaaggggttccttcaagtacgcctgggttcttgacaagct
caaggccgagcgtgagcgtggtatcaccatcgatattgctctctggaagttcgagactcc
tcgctactatgtcaccgctcattggtatggtgctcgtcgtcatgcttcattctacttctcttcg
tacta--acatcactcagacgctcccggtcaccgtgatttcatcaaga
>SP_FOA20
acgactcgaaacgtgcccgtacccccgctcgagaccaaaaaattttgcaatatgactgtaa
tttttttgggtggggcacttaccgcccacttgagcgacgggagcggttgccctcttaac
cattctcacaacctcaatgagtgcgctcgtcacgtgtcaagcagtcactaaccattcaaca
ataggaagccgctgagctcggttaaggggttccttcaagtacgcctgggttcttgacaagct
caaggccgagcgtgagcgtggtatcaccatcgatattgctctctggaagttcgagactcc
tcgctactatgtcaccgctcattggtatggtgctcgtcgtcatgcttcattctacttctcttcg
tacta--acatcactcagacgctcccggtcaccgtgatttcatcaaga

```

## S2: Final alignments in FASTA format (RPB1)

```

>fusarium_proliferatum_et1_gca_900067095
catttgccgccaaccaataactcccattggacgagatggtaaattggccaagccccgacag
cttcacaataactcactgggggtttggtgtgtcccgcgaaacgcctgaggggtcaagcttgt
gggtctgggtcaaaaacttgtctctgatgtgttatgtcagtgctcggtctccagccgatcct
ctcattgaattcatgatcaacagaggtatggaagtcgttgaggagtacgagccgacaaga
tatccccacgctacaaaagattttcgtcaacggtagctgggttgggtgttcacgccgacccc
aagcatctcgtgaatcagggttttgacacaaagacgaaagtcgtacgtccagttcgaagta
tcacttgttcgtgatattcgagaccgtgaattcaagatcttctcagatgctgggtcgtgtc
atgagacctgtcttcacaggtccatcaggaggatgactacgagaacaacatcaccaaggga
caactagtgttgacaaaaggaacatgtcaacaggctagcgcaagagcaggcagagccacct
gccaacccccgctgacaagtttggtatgggatggcttgattcgcaaggagctgtcgagtat
ctcgacgccgaggaagaagagacagccatgatttgcattgacgccagaggatctcgaactt
taccgtgagcaaaaagaatgatgaagctacactcacggaagaggagaaaacgggccaaggct
gaggcagagaagagggaacaggaggaggaccgcaacaagcgattgaagacaaaggtcaac
cccacaactcacatgtacacacatttgcgagattcaccgccagtatgattctcggtatctgt
gccagtatcattc
>fusarium_oxysporum_fo47_gca_000271705
catttgcgtcgaaccaataactcccattcgacgagatggtaaattggccaagcctcgacag
cttcacaacactcactgggggtttggtgtgtcctgcccgaacacctgaggggtcaagcttgt
gggtctgggtcaaaaacttgtctctgatgtgtttacgtcagtgctcggtctccagccgatcct
ctgattgaattcatgatcaacagaggtatggaagtcgttgaggagtacgagccgacaaga
tccccccacgctacaaaagattttcgtcaacggtagctgggttgggtgttcattgccgacccc
aagcatctcgtgaatcagggtcttgacacaaagacgaaagtcctacgtgcagttcgaagta
tcacttgttcgtgatattcgagaccgtgaattcaagattttctcagacgctggccgtgtc
atgagacccgtctttacagttcatcaggaggatgactatgagaacaacatcaccaaggga
caactagtgttgacaaaaggaccatgtcaataggctagcccaagaacaggcagagcctcct
gccaacccagcggacaagtttggtatgggatggcttgatccgcgaaggagctgtcgagtat
ctcgatgctgaggaagaagagacagccatgatttgcattgacgccagaggatctcgaactt
taccgtgagcaaaaagaatgatgaagctacactcacagaagaagagaaaacgggccaagcaa
gaggcagagaagagagaacaagaggaggaccgcaacaagcgattgaagacaaaggtgaac
cccacaactcacatgtacacacatttgtgagattcaccgccagtatgattctcggtatctgt
gccagtatcattc
>GASP_2
catttgcgtcgaaccaataactcccattcgacgagatggtaaattggccaagcctcgacag
cttcacaacactcactgggggtttggtgtgtcctgcccgaacacctgaggggtcaagcttgt

```

ggctctgggtcaaaaacttgtctctaattgtgttacgtcagtgctcggtctctccagccgatcct  
ctgattgaattcatgatcaacagaggcatggaagtcgttgaggagtacgagccgacaaga  
tccccccacgctacaaagatttttcgtcaacggtagctgggttggtgttcatgccgacccc  
aagcatctcgtgaatcaggtcttggacacaagacgaaaagtcttacgtgcagttcgaagta  
tcacttggtcgtgatataccgagaccgtgaattcaagattttctcagacgctggccgtgtc  
atgagacccgtctttacagttcatcaggaggatgactatgagaacaacatcaccaaggga  
caactagtgttgacaaaggaccatgtcaataggctagcccaagaacaggcagagcctcct  
gccaacccagcggacaagtttggatgggatggcttgatccgcgaaggagctgtcgagtat  
ctcgatgctgaggaagaagagacagccatgatttgcagacgccagaggatctcgaactt  
taccgtgagcaaaagaatgatgaagctacactcacagaagaagagaaaacgggccaagcaa  
gaggcagagaagagagaacaagaggaggaccgcaacaagcgattgaagacaaaggtgaac  
cccacaactcacatgtacacacattgtgagattcaccaccagtatgattctcggtatctgt  
gccagtatcattc

>GASP\_3

catttgctcgaaccaataactcccatcggacgagatggtaaattggccaagcctcgacag  
cttcacaacactcactggggttttggtgtgtcctgccgaaacacctgaggggtcaagcttgt  
ggctctgggtcaaaaacttgtctctaattgtgttacgtcagtgctcggtctctccagccgatcct  
ctgattgaattcatgatcaacagaggcatggaagtcgttgaggagtacgagccgacaaga  
tccccccacgctacaaagatttttcgtcaacggtagctgggttggtgttcatgccgacccc  
aagcatctcgtgaatcaggtcttggacacaagacgaaaagtcttacgtgcagttcgaagta  
tcacttggtcgtgatataccgagaccgtgaattcaagattttctcagacgctggccgtgtc  
atgagacccgtctttacagttcatcaggaggatgactatgagaacaacatcaccaaggga  
caactagtgttgacaaaggaccatgtcaataggctagcccaagaacaggcagagcctcct  
gccaacccagcggacaagtttggatgggatggcttgatccgcgaaggagctgtcgagtat  
ctcgatgctgaggaagaagagacagccatgatttgcagacgccagaggatctcgaactt  
taccgtgagcaaaagaatgatgaagctacactcacagaagaagagaaaacgggccaagcaa  
gaggcagagaagagagaacaagaggaggaccgcaacaagcgattgaagacaaaggtgaac  
cccacaactcacatgtacacacattgtgagattcaccaccagtatgattctcggtatctgt  
gccagtatcattc

>GASP\_4

catttgctcgaaccaataactcccatcggacgagatggtaaattggccaagcctcgacag  
cttcacaacactcactggggttttggtgtgtcctgccgaaacacctgaggggtcaagcttgt  
ggctctgggtcaaaaacttgtctctgatgtgttacgtcagtgctcggtctctccagccgatcct  
ctgattgaattcatgatcaacagaggcatggaagtcgttgaggagtacgagccgacaaga  
tccccccacgctacaaagatttttcgtcaacggtagctgggttggtgttcatgccgacccc  
aagcatctcgtgaatcaggtcttggacacaagacgaaaagtcttacgtgcagttcgaagta  
tcacttggtcgtgatataccgagaccgtgaattcaagattttctcagacgctggccgtgtc  
atgagacccgtctttacagttcatcaggaggatgactatgagaacaacatcaccaaggga  
caactagtgttgacaaaggaccatgtcaataggctagcccaagaacaggcagagcctcct  
gccaacccagcggacaagtttggatgggatggcttgatccgcgaaggagctgtcgagtat  
ctcgatgctgaggaagaagagacagccatgatttgcagacgccagaggatcttgaactt  
taccgtgagcaaaagaatgatgaagctacactcacagaagaagagaaaacgggccaagcaa  
gaggcagagaagagagaacaagaggaggaccgcaacaagcgattgaagacaaaggtgaac  
cccacaactcacatgtacacacattgtgagattcaccaccagtatgattctcggtatctgt  
gccagtatcattc

>GASP\_5

-----ggacgagatggtaaattggccaagcctcgacag  
cttcacaacactcactggggttttggtgtgtcctgccgaaacacctgaggggtcaagcttgt  
ggctctgggtcaaaaacttgtctctgatgtgttacgtcagtgctcggtctctccagccgatcct  
ctgattgaattcatgatcaacagaggcatggaagtcgttgaggagtacgagccgacaaga  
tccccccacgctacaaagatttttcgtcaacggtagctgggttggtgttcatgccgacccc  
aagcatctcgtgaatcaggtcttggacacaagacgaaaagtcttacgtgcagttcgaagta  
tcacttggtcgtgatataccgagaccgtgaattcaagattttctcagacgctggccgtgtc  
atgagacccgtctttacagttcatcaggaggatgactatgagaacaacatcaccaaggga  
caactagtgttgacaaaggaccatgtcaataggctagcccaagaacaggcagagcctcct  
gccaacccagcggacaagtttggatgggatggcttgatccgcgaaggagctgtcgagtat  
ctcgatgctgaggaagaagagacagccatgatttgcagacgccagaggatctcgaactt  
taccgtgagcaaaagaatgatgaagctacactcacagaagaagagaaaacgggccaagcaa  
gaggcagagaagagagaacaagaggaggaccgcaacaagcgattgaagacaaaggtgaac  
cccacaactcacatgtacacacattgtgagattcaccaccagtatgattctcggtatctgt  
gccagtatcattc



>GASP\_9

catttgcgctcgaaccaataactcccatcggacgagatggtaaattggccaagcctcgacag  
cttcacaacactcactgggggtttggtgtgtcctgccgaaacacctgaggggtcaagcttgt  
gggtctgggtcaaaaacttggtctctaattgtgttacgtcagtgctcggtctctccagccgatcct  
ctgattgaattcatgatcaacagagggcatggaagtcggtgaggagtacgagccgacaaga  
tccccccacgctacaaagattttcgtcaacggtagctgggttgggtgttcatgccgacccc  
aagcatctcgtgaatcaggtccttggacacaagacgaaagtcttacgtgcagttcgaagta  
tcacttggtcgtgatataccgagaccgtgaattcaagattttctcagacgctggccgtgtc  
atgagacccgctctttacagttcatcaggaggatgactatgagaacaacatcaccaaggga  
caactagtgttgacaaaggaccatgtcaataggctagcccaagaacaggcagagcctcct  
gccaacccagcggacaagtttggatgggatggcttgatccgcgaaggagctgtcagat  
ctcgatgctgaggaagaagagacagccatgatttgcagtgacgccagaggatctcgaactt  
taccgtgagcaaaaagaatgatgaagctacactcacagaagaagagaaaacgggccaagcaa  
gaggcagagaagagagaacaagaggaggaccgcaacaagcgattgaagacaaaggtgaac  
cccacaactcacatgtacacacattgtgagattcaccccagtatgattctcggtatctgt  
gccagtatcattc

>GA\_1.2

catttgcgctcgaaccaataactcccatcggacgagatggtaaattggccaagcctcgacag  
cttcacaacactcactgggggtttggtgtgtcctgccgaaacacctgaggggtcaagcttgt  
gggtctgggtcaaaaacttggtctctaattgtgttacgtcagtgctcggtctctccagccgatcct  
ctgattgaattcatgatcaacagagggcatggaagtcggtgaggagtacgagccgacaaga  
tccccccacgctacaaagattttcgtcaacggtagctgggttgggtgttcatgccgacccc  
aagcatctcgtgaatcaggtccttggacacaagacgaaagtcttacgtgcagttcgaagta  
tcacttggtcgtgatataccgagaccgtgaattcaagattttctcagacgctggccgtgtc  
atgagacccgctctttacagttcatcaggaggatgactatgagaacaacatcaccaaggga  
caactagtgttgacaaaggaccatgtcaataggctagcccaagaacaggcagagcctcct  
gccaacccagcggacaagtttggatgggatggcttgatccgcgaaggagctgtcagat  
ctcgatgctgaggaagaagagacagccatgatttgcagtgacgccagaggatctcgaactt  
taccgtgagcaaaaagaatgatgaagctacactcacagaagaagagaaaacgggccaagcaa  
gaggcagagaagagagaacaagaggaggaccgcaacaagcgattgaagacaaaggtgaac  
cccacaactcacatgtacacacattgtgagattcaccccagtatgattctcggtatctgt  
gccagtatcattc

>GA\_1.3

catttgcgctcgaaccaataactcccatcggacgagatggtaaattggccaagcctcgacag  
cttcacaacactcactgggggtttggtgtgtcctgccgaaacacctgaggggtcaagcttgt  
gggtctgggtcaaaaacttggtctctaattgtgttacgtcagtgctcggtctctccagccgatcct  
ctgattgaattcatgatcaacagagggcatggaagtcggtgaggagtacgagccgacaaga  
tccccccacgctacaaagattttcgtcaacggtagctgggttgggtgttcatgccgacccc  
aagcatctcgtgaatcaggtccttggacacaagacgaaagtcttacgtgcagttcgaagta  
tcacttggtcgtgatataccgagaccgtgaattcaagattttctcagacgctggccgtgtc  
atgagacccgctctttacagttcatcaggaggatgactatgagaacaacatcaccaaggga  
caactagtgttgacaaaggaccatgtcaataggctagcccaagaacaggcagagcctcct  
gccaacccagcggacaagtttggatgggatggcttgatccgcgaaggagctgtcagat  
ctcgatgctgaggaagaagagacagccatgatttgcagtgacgccagaggatctcgaactt  
taccgtgagcaaaaagaatgatgaagctacactcacagaagaagagaaaacgggccaagcaa  
gaggcagagaagagagaacaagaggaggaccgcaacaagcgattgaagacaaaggtgaac  
cccacaactcacatgtacacacattgtgagattcaccccagtatgattctcggtatctgt  
gccagtatcattc

>GA\_1.4

catttgcgctcnaaccaataactcccatcggacgagatggtaaattggccaagcctcgacag  
cttcacaacactcactgggggtttggtgtgtcctgccgaaacacctgaggggtcaagcttgt  
gggtctgggtcaaaaacttggtctctaattgtgttacgtcagtgctcggtctctccagccgatcct  
ctgattgaattcatgatcaacagagggcatggaagtcggtgaggagtacgagccgacaaga  
tccccccacgctacaaagattttcgtcaacggtagctgggttgggtgttcatgccgacccc  
aagcatctcgtgaatcaggtccttggacacaagacgaaagtcttacgtgcagttcgaagta  
tcacttggtcgtgatataccgagaccgtgaattcaagattttctcagacgctggccgtgtc  
atgagacccgctctttacagttcatcaggaggatgactatgagaacaacatcaccaaggga  
caactagtgttgacaaaggaccatgtcaataggctagcccaagaacaggcagagcctcct  
gccaacccagcggacaagtttggatgggatggcttgatccgcgaaggagctgtcagat  
ctcgatgctgaggaagaagagacagccatgatttgcagtgacgccagaggatctcgaactt  
taccgtgagcaaaaagaatgatgaagctacactcacagaagaagagaaaacgggccaagcaa  
taccgtgagcaaaaagaatgatgaagctacactcacagaagaagagaaaacgggccaagcaa

gaggcagagaagagagaacaagaggaggaccgcaacaagcgattgaagacaaaggtgaac  
cccacaactcacatgtacacacattgtgagattcaccccagtatgattctcggtatctgt  
gccagtatcattc

>GA\_10

catttgcgtcgaaccaataactcccatcggacgagatggtaaattggccaagcctcgacag  
cttcacaacactcactgggggtttggtgtgtcctgccgaaacacctgaggggtcaagcttgt  
ggtctggtcaaaaacttgtctctaattgtgttacgtcagtgctcggtctctccagccgatcct  
ctgattgaattcatgatcaacagaggcatggaagtcgttgaggagtacgagccgacaaga  
tccccccacgctacaaagattttcgtcaacggtagctgggttggtgttcattgcccagcccc  
aagcatctcgtgaatcaggtccttggacacaagacgaaagtcttacgtgcagttcgaagta  
tcacttgttcgtgatatccgagaccgtgaattcaagattttctcagacgctggccgtgtc  
atgagacccgctctttacagttcatcaggaggatgactatgagaacaacatcaccaaggga  
caactagtgttgacaaaggaccatgtcaataggctagcccaagaacaggcagagcctcct  
gccaacccagcggacaagtttggatgggatggcttgatccgcgaaggagctgtcgagtat  
ctcgatgctgaggaagaagagacagccatgatttgcattgacgccagaggatctcgaactt  
taccgtgagcaaaaagaatgatgaagctacactcacagaagaagagaaaacgggccaagcaa  
gaggcagagaagagagaacaagaggaggaccgcaacaagcgattgaagacaaaggtgaac  
cccacaactcacatgtacacacattgtgagattcaccccagtatgattctcggtatctgt  
gccagtatcattc

>GA\_3.2

catttgcgtcgaaccaataactcccatcggacgagatggtaaattggccaagcctcgacag  
cttcacaacactcactgggggtttggtgtgtcctgccgaaacacctgaggggtcaagcttgt  
ggtctggtcaaaaacttgtctctaattgtgttacgtcagtgctcggtctctccagccgatcct  
ctgattgaattcatgatcaacagaggcatggaagtcgttgaggagtacgagccgacaaga  
tccccccacgctacaaagattttcgtcaacggtagctgggttggtgttcattgcccagcccc  
aagcatctcgtgaatcaggtccttggacacaagacgaaagtcttacgtgcagttcgaagta  
tcacttgttcgtgatatccgagaccgtgaattcaagattttctcagacgctggccgtgtc  
atgagacccgctctttacagttcatcaggaggatgactatgagaacaacatcaccaaggga  
caactagtgttgacaaaggaccatgtcaataggctagcccaagaacaggcagagcctcct  
gccaacccagcggacaagtttggatgggatggcttgatccgcgaaggagctgtcgagtat  
ctcgatgctgaggaagaagagacagccatgatttgcattgacgccagaggatctcgaactt  
taccgtgagcaaaaagaatgatgaagctacactcacagaagaagagaaaacgggccaagcaa  
gaggcagagaagagagaacaagaggaggaccgcaacaagcgattgaagacaaaggtgaac  
cccacaactcacatgtacacacattgtgagattcaccccagtatgattctcggtatctgt  
gccagtatcattc

>GA\_3.3

catttgcgtcgaaccaataactcccatcggacgagatggtaaattggccaagcctcgacag  
cttcacaacactcactgggggtttggtgtgtcctgccgaaacacctgaggggtcaagcttgt  
ggtctggtcaaaaacttgtctctaattgtgttacgtcagtgctcggtctctccagccgatcct  
ctgattgaattcatgatcaacagaggcatggaagtcgttgaggagtacgagccgacaaga  
tccccccacgctacaaagattttcgtcaacggtagctgggttggtgttcattgcccagcccc  
aagcatctcgtgaatcaggtccttggacacaagacgaaagtcttacgtgcagttcgaagta  
tcacttgttcgtgatatccgagaccgtgaattcaagattttctcagacgctggccgtgtc  
atgagacccgctctttacagttcatcaggaggatgactatgagaacaacatcaccaaggga  
caactagtgttgacaaaggaccatgtcaataggctagcccaagaacaggcagagcctcct  
gccaacccagcggacaagtttggatgggatggcttgatccgcgaaggagctgtcgagtat  
ctcgatgctgaggaagaagagacagccatgatttgcattgacgccagaggatctcgaactt  
taccgtgagcaaaaagaatgatgaagctacactcacagaagaagagaaaacgggccaagcaa  
gaggcagagaagagagaacaagaggaggaccgcaacaagcgattgaagacaaaggtgaac  
cccacaactcacatgtacacacattgtgagattcaccccagtatgattctcggtatctgt  
gccagtatcattc

>GA\_3.5

catttgcgtcnaaccaataactcccatcggacgagatggtaaattggccaagcctcgacag  
cttcacaacactcactgggggtttggtgtgtcctgccgaaacacctgaggggtcaagcttgt  
ggtctggtcaaaaacttgtctctaattgtgttacgtcagtgctcggtctctccagccgatcct  
ctgattgaattcatgatcaacagaggcatggaagtcgttgaggagtacgagccgacaaga  
tccccccacgctacaaagattttcgtcaacggtagctgggttggtgttcattgcccagcccc  
aagcatctcgtgaatcaggtccttggacacaagacgaaagtcttacgtgcagttcgaagta  
tcacttgttcgtgatatccgagaccgtgaattcaagattttctcagacgctggccgtgtc  
atgagacccgctctttacagttcatcaggaggatgactatgagaacaacatcaccaaggga  
caactagtgttgacaaaggaccatgtcaataggctagcccaagaacaggcagagcctcct

gccaaaccagcggacaagtttggatgggatggcttgatccgcgaaggagctgtcgagtat  
ctcgatgctgaggaagaagagacagccatgatttgcagtgacgccagaggatctcgaactt  
taccgtgagcaaaagaatgatgaagctacactcacagaagaagagaaaacgggccaagcaa  
gaggcagagaagagagaacaagaggaggaccgcaacaagcgattgaagacaaaggtgaac  
cccacaactcacatgtacacacattgtgagattcaccccagtatgattctcggtatctgt  
gccagtatcattc

>GA\_3.6

catttgcgtcgaaccaataactcccatcggacgagatggtaaattggccaagcctcgacag  
cttcacaacactcactggggttttggtgtgtcctgccgaaacacctgaggggtcaagcttgt  
ggctctgggtcaaaaacttgtctctaattgtgttacgtcagtgctcggtctctccagccgatcct  
ctgattgaattcatgatcaacagagggcatggaagtgttgaggagtacgagccgacaaga  
tccccccacgctacaaagattttcgtcaacggtagctgggttggtgttcatgccgacccc  
aagcatctcgtgaatcaggtccttgacacacaagacgaaagtcttacgtgcagttcgaagta  
tcacttggtcgtgatataccgagaccgtgaattcaagattttctcagacgctggccgtgtc  
atgcgacccgtctttacagttcatcaggaggatgactatgagaacaacatcaccaagggga  
caactagtgttgacaaaggaccatgtcaataggctagcccaagaacaggcagagcctcct  
gccaaaccagcggacaagtttggatgggatggcttgatccgcgaaggagctgtcgagtat  
ctcgatgctgaggaagaagagacagccatgatttgcagtgacgccagaggatctcgaactt  
taccgtgagcaaaagaatgatgaagctacactcacagaagaagagaaaacgggccaagcaa  
gaggcagagaagagagaacaagaggaggaccgcaacaagcgattgaagacaaaggtgaac  
cccacaactcacatgtacacacattgtgagattcaccccagtatgattctcggtatctgt  
gccagtatca---

>GA\_3.7

catttgcgtcgaaccaataactcccatcggacgagatggtaaattggccaagcctcgacag  
cttcacaacactcactggggttttggtgtgtcctgccgaaacacctgaggggtcaagcttgt  
ggctctgggtcaaaaacttgtctctaattgtgttacgtcagtgctcggtctctccagccgatcct  
ctgattgaattcatgatcaacagagggcatggaagtcgttgaggagtacgagccgacaaga  
tccccccacgctacaaagattttcgtcaacggtagctgggttggtgttcatgccgacccc  
aagcatctcgtgaatcaggtccttgacacacaagacgaaagtcttacgtgcagttcgaagta  
tcacttggtcgtgatataccgagaccgtgaattcaagattttctcagacgctggccgtgtc  
atgagacccgtctttacagttcatcaggaggatgactatgagaacaacatcaccaagggga  
caactagtgttgacaaaggaccatgtcaataggctagcccaagaacaggcagagcctcct  
gccaaaccagcggacaagtttggatgggatggcttgatccgcgaaggagctgtcgagtat  
ctcgatgctgaggaagaagagacagccatgatttgcagtgacgccagaggatctcgaactt  
taccgtgagcaaaagaatgatgaagctacactcacagaagaagagaaaacgggccaagcaa  
gaggcagagaagagagaacaagaggaggaccgcaacaagcgattgaagacaaaggtgaac  
cccacaactcacatgtacacacattgtgagattcaccccagtatgattctcggtatctgt  
gccagtatcattc

>GA\_4.1

catttgcgtcgaaccaataactcccatcggacgagatggtaaattggccaagcctcgacag  
cttcacaacactcactggggttttggtgtgtcctgccgaaacacctgaggggtcaagcttgt  
ggctctgggtcaaaaacttgtctctaattgtgttacgtcagtgctcggtctctccagccgatcct  
ctgattgaattcatgatcaacagagggcatggaagtcgttgaggagtacgagccgacaaga  
tccccccacgctacaaagattttcgtcaacggtagctgggttggtgttcatgccgacccc  
aagcatctcgtgaatcaggtccttgacacacaagacgaaagtcttacgtgcagttcgaagta  
tcacttggtcgtgatataccgagaccgtgaattcaagattttctcagacgctggccgtgtc  
atgagacccgtctttacagttcatcaggaggatgactatgagaacaacatcaccaagggga  
caactagtgttgacaaaggaccatgtcaataggctagcccaagaacaggcagagcctcct  
gccaaaccagcggacaagtttggatgggatggcttgatccgcgaaggagctgtcgagtat  
ctcgatgctgaggaagaagagacagccatgatttgcagtgacgccagaggatctcgaactt  
taccgtgagcaaaagaatgatgaagctacactcacagaagaagagaaaacgggccaagcaa  
gaggcagagaagagagaacaagaggaggaccgcaacaagcgattgaagacaaaggtgaac  
cccacaactcacatgtacacacattgtgagattcaccccagtatgattctcggtatctgt  
gccagtatcattc

>GA\_4.2

catttgcgtcgaaccaataactcccatcggacgagatggtaaattggccaagcctcgacag  
cttcacaacactcactggggttttggtgtgtcctgccgaaacacctgaggggtcaagcttgt  
ggctctgggtcaaaaacttgtctctaattgtgttacgtcagtgctcggtctctccagccgatcct  
ctgattgaattcatgatcaacagagggcatggaagtcgttgaggagtacgagccgacaaga  
tccccccacgctacaaagattttcgtcaacggtagctgggttggtgttcatgccgacccc  
aagcatctcgtgaatcaggtccttgacacacaagacgaaagtcttacgtgcagttcgaagta

tcaacttggttcgtgatatccgagaccgtgaattcaagatTTTTCTCAGACGCTGGCCGTGTC  
atgagacccgtctttacagttcatcaggaggatgactatgagaacaacatcaccaagga  
caactagtgttgacaaaggaccatgtcaataggctagcccaagaacaggcagagcctcct  
gccaacccagcgggacaagtttggtggtggtggttgccttgatccgcgaaggagctgtcgagtat  
ctcgatgctgaggaagaagagacagccatgatttgcacgacccagaggatctcgaactt  
taccgtgagcaaaaagaatgatgaagctacactcacagaagaagagaaaacgggccaagcaa  
gaggcagagaagagagaacaagaggaggaccgcaacaagcgattgaagacaaaggtgaac  
cccacaactcacatgtacacacattgtgagattcaccgccagtatgattctcggtatctgt  
gccagtatcattc

>GA\_4.3

catttgcgctgaaccaataactcccatcggacgagatggtaaattggccaagcctcgacag  
cttcacaacactcactggggttttggtgtgtcctgccgaaacacctgagggtaagcttgt  
ggtctggtcaaaaacttgtctctaattgtgttacgtcagtgctcggtctccagccgatcct  
ctgattgaattcatgatcaacagaggcatggaagtcgttgaggagtacgagccgacaaga  
tccccccacgctacaaagatTTTCTGTC AACCGGTAGCTGGGTTGGTGTT CATGCCGACCCC  
aagcatctcgtgaatcaggtcttggacacaagacgaaagtcttacgtgcagttcgaagta  
tcaacttggttcgtgatatccgagaccgtgaattcaagatTTTTCTCAGACGCTGGCCGTGTC  
atgagacccgtctttacagttcatcaggaggatgactatgagaacaacatcaccaagga  
caactagtgttgacaaaggaccatgtcaataggctagcccaagaacaggcagagcctcct  
gccaacccagcgggacaagtttggtggtggtggttgccttgatccgcgaaggagctgtcgagtat  
ctcgatgctgaggaagaagagacagccatgatttgcacgacccagaggatctcgaactt  
taccgtgagcaaaaagaatgatgaagctacactcacagaagaagagaaaacgggccaagcaa  
gaggcagagaagagagaacaagaggaggaccgcaacaagcgattgaagacaaaggtgaac  
cccacaactcacatgtacacacattgtgagattcaccgccagtatgattctcggtatctgt  
gccagtatcattc

>GA\_5.3

catttgcgctgaaccaataactcccatcggacgagatggtaaattggccaagcctcgacag  
cttcacaacactcactggggttttggtgtgtcctgccgaaacacctgagggtaagcttgt  
ggtctggtcaaaaacttgtctctaattgtgttacgtcagtgctcggtctccagccgatcct  
ctgattgaattcatgatcaacagaggcatggaagtcgttgaggagtacgagccgacaaga  
tccccccacgctacaaagatTTTCTGTC AACCGGTAGCTGGGTTGGTGTT CATGCCGACCCC  
aagcatctcgtgaatcaggtcttggacacaagacgaaagtcttacgtgcagttcgaagta  
tcaacttggttcgtgatatccgagaccgtgaattcaagatTTTTCTCAGACGCTGGCCGTGTC  
atgagacccgtctttacagttcatcaggaggatgactatgagaacaacatcaccaagga  
caactagtgttgacaaaggaccatgtcaataggctagcccaagaacaggcagagcctcct  
gccaacccagcgggacaagtttggtggtggtggttgccttgatccgcgaaggagctgtcgagtat  
ctcgatgctgaggaagaagagacagccatgatttgcacgacccagaggatctcgaactt  
taccgtgagcaaaaagaatgatgaagctacactcacagaagaagagaaaacgggccaagcaa  
gaggcagagaagagagaacaagaggaggaccgcaacaagcgattgaagacaaaggtgaac  
cccacaactcacatgtacacacattgtgagattcaccgccagtatgattctcggtatctgt  
gccagtatcattc

>GA\_5.4

catttgcgctgaaccaataactcccatcggacgagatggtaaattggccaagcctcgacag  
cttcacaacactcactggggttttggtgtgtcctgccgaaacacctgagggtaagcttgt  
ggtctggtcaaaaacttgtctctaattgtgttacgtcagtgctcggtctccagccgatcct  
ctgattgaattcatgatcaacagaggcatggaagtcgttgaggagtacgagccgacaaga  
tccccccacgctacaaagatTTTCTGTC AACCGGTAGCTGGGTTGGTGTT CATGCCGACCCC  
aagcatctcgtgaatcaggtcttggacacaagacgaaagtcttacgtgcagttcgaagta  
tcaacttggttcgtgatatccgagaccgtgaattcaagatTTTTCTCAGACGCTGGCCGTGTC  
atgagacccgtctttacagttcatcaggaggatgactatgagaacaacatcaccaagga  
caactagtgttgacaaaggaccatgtcaataggctagcccaagaacaggcagagcctcct  
gccaacccagcgggacaagtttggtggtggtggttgccttgatccgcgaaggagctgtcgagtat  
ctcgatgctgaggaagaagagacagccatgatttgcacgacccagaggatctcgaactt  
taccgtgagcaaaaagaatgatgaagctacactcacagaagaagagaaaacgggccaagcaa  
gaggcagagaagagagaacaagaggaggaccgcaacaagcgattgaagacaaaggtgaac  
cccacaactcacatgtacacacattgtgagattcaccgccagtatgattctcggtatctgt  
gccagtatcattc

>GA\_92.3

catttgcgctgaaccaataactcccatcggacgagatggtaaattggccaagcctcgacag  
cttcacaacactcactggggttttggtgtgtcctgccgaaacacctgagggtaagcttgt  
ggtctggtcaaaaacttgtctctaattgtgttacgtcagtgctcggtctccagccgatcct

ctgattgaattcatgatcaacagaggcatggaagtcggttgaggagtacgagccgacaaga  
tccccccacgctacaaagatttttcgtcaacggtagctgggttggtgttcatgccgacccc  
aagcatctcgtgaatcaggtcttggacacaagacgaaagtcttacgtgcagttcgaagta  
tcacttggttcgtgatataccgagaccgtgaattcaagattttctcagacgctggccgtgtc  
atgagaccccgcttttacagttcatcaggaggatgactatgagaacaacatcaccaaggga  
caactagtgttgacaaaggaccatgtcaataggctagcccaagaacaggcagagcctcct  
gccaacccagcggacaagtttggatgggatggcttgatccgcgaaggagctgtcagagtat  
ctcgatgctgaggaagaagagacagccatgatttgcagtgacgccagaggatctcgaactt  
taccgtgagcaaaaagaatgatgaagctacactcacagaagaagagaaaacgggccaagcaa  
gaggcagagaagagagaacaagaggaggaccgcaacaagcgattgaagacaaaggtgaac  
cccacaactcacatgtacacacattgtgagattcaccaccagtatgattctcggtatctgt  
gccagtatcattc

>GA\_99.2

catttgcgtcnaaccaataactcccatcggacgagatggtaaattggccaagcctcgacag  
cttcacaacactcactggggttttggtgtgtcctgccgaaacacctgaggggtcaagcttgt  
ggctcgtggtcaaaaacttgtctctaattgtgttacgtcagtgctcggtctctccagccgatcct  
ctgattgaattcatgatcaacagaggcatggaagtcggttgaggagtacgagccgacaaga  
tccccccacgctacaaagatttttcgtcaacggttagctgggttggtgttcatgccgacccc  
aagcatctcgtgaatcaggtcttggacacaagacgaaagtcttacgtgcagttcgaagta  
tcacttggttcgtgatataccgagaccgtgaattcaagattttctcagacgctggccgtgtc  
atgagaccccgcttttacagttcatcaggaggatgactatgagaacaacatcaccaaggga  
caactagtgttgacaaaggaccatgtcaataggctagcccaagaacaggcagagcctcct  
gccaacccagcggacaagtttggatgggatggcttgatccgcgaaggagctgtcagagtat  
ctcgatgctgaggaagaagagacagccatgatttgcagtgacgccagaggatctcgaactt  
taccgtgagcaaaaagaatgatgaagctacactcacagaagaagagaaaacgggccaagcaa  
gaggcagagaagagagaacaagaggaggaccgcaacaagcgattgaagacaaaggtgaac  
cccacaactcacatgtacacacattgtgagattcaccaccagtatgattctcggtatctgt  
gccagtatcattc

>NL\_FOA01

catttgcgtcgaaccaataactcccatcggacgagatggtaaattggccaagcctcgacag  
cttcacaacactcactggggttttggtgtgtcctgccgaaacacccgaggggtcaagcttgt  
ggctcgtggtcaaaaacttgtctctgatgtgttacgtcagtggttggtctctccggccgatcct  
ctgattgaattcatgatcaacagaggcatggaagtcggttgaggagtacgagccgacaaga  
tccccccacgctacaaagatttttcgtcaacggttagctgggttggtgttcatgccgacccc  
aagcatctcgtgaatcaggtcttggacacaaggcgaaagtcttacgtgcagttcgaagta  
tcacttggttcgtgatataccgagaccgtgaattcaagattttctcagacgctggccgtgtc  
atgagaccccgcttttacagttcatcaggaggatgactatgagaacaacatcaccaaggga  
caactagtgttgacaaaggaccatgtcaataggctagcccaagagcaggcagagcctcct  
gccaacccagcggacaagtttggatgggatggcttgatccgcgaaggagctgtcagagtat  
ctcgatgctgaggaagaagagacagccatgatttgcagtgacgccagaggatctcgaactt  
taccgtgagcaaaaagaatgatgaagctacactcacagaagaagagaaaacgggccaagcaa  
gaggcagagaagagggaacaagaggaggaccgcaacaagcgattgaagacaaaggtgaac  
cccacaactcacatgtacacacattgtgagattcaccaccagtatgattctcggtatctgt  
gccagtatcattc

>NL\_FOA02

catttgcgtcgaaccaataactcccatcggacgagatggtaaattggccaagcctcgacag  
cttcacaacactcactggggttttggtgtgtcctgccgaaacacccgaggggtcaagcttgt  
ggctcgtggtcaaaaacttgtctctgatgtgttacgtcagtggttggtctctccggccgatcct  
ctgattgaattcatgatcaacagaggcatggaagtcggttgaggagtacgagccgacaaga  
tccccccacgctacaaagatttttcgtcaacggttagctgggttggtgttcatgccgacccc  
aagcatctcgtgaatcaggtcttggacacaaggcgaaagtcttacgtgcagttcgaagta  
tcacttggttcgtgatataccgagaccgtgaattcaagattttctcagacgctggccgtgtc  
atgagaccccgcttttacagttcatcaggaggatgactatgagaacaacatcaccaaggga  
caactagtgttgacaaaggaccatgtcaataggctagcccaagagcaggcagagcctcct  
gccaacccagcggacaagtttggatgggatggcttgatccgcgaaggagctgtcagagtat  
ctcgatgctgaggaagaagagacagccatgatttgcagtgacgccagaggatctcgaactt  
taccgtgagcaaaaagaatgatgaagctacactcacagaagaagagaaaacgggccaagcaa  
gaggcagagaagagggaacaagaggaggaccgcaacaagcgattgaagacaaaggtgaac  
cccacaactcacatgtacacacattgtgagattcaccaccagtatgattctcggtatctgt  
gccagtatcattc

>NL\_FOA03

catttgcgctcgaaccaataactcccatcggacgagatggtaaattggccaagcctcgacag  
cttcacaacactcactggggttttggtgtgtcctgccgaaacacctgaggggtcaagcttgt  
gggtctgggtcaaaaacttggtctctaattgtgttacgtcagtgctcggtctccagccgatcct  
ctgattgaattcatgatcaacagagggcatggaagtcggtgaggagtacgagccgacaaga  
tccccccacgctacaaagattttcgtcaacggtagctgggttggtgttcacgaccccc  
aagcatctcgtgaatcaggtccttgacacaagacgaaagtcttacgtgcagttcgaagta  
tcacttggtcgtgatataccgagaccgtgaattcaagattttctcagacgctggccgtgtc  
atgagacccgtctttacagttcatcaggaggatgactatgagaacaacatcaccaaggga  
caactagtgttgacaaaaggaccatgtcaataggctagcccaagaacaggcagagcctcct  
gccaacccagcggacaagtttggtatgggtatggcttgatccgcgaaggagctgtcagat  
ctcgatgctgaggaagaagagacagccatgatttgcatgacgccagaggatctcgaactt  
taccgtgagcaaaaagaatgatgaagctacactcacagaagaagagaaaacgggccaagcaa  
gaggcagagaagagagaacaagaggaggaccgcaacaagcgattgaagacaaaggtgaac  
cccacaactcacatgtacacacattgtgagattcaccccagtatgattctcggtatctgt  
gccagtatcattc

>NL\_FOA04

catttgcgctcgaaccaataactcccatcggacgagatggtaaattggccaagcctcgacag  
cttcacaacactcactggggttttggtgtgtcctgccgaaacacctgaggggtcaagcttgt  
gggtctgggtcaaaaacttggtctctaattgtgttacgtcagtgctcggtctccagccgatcct  
ctgattgaattcatgatcaacagagggcatggaagtcggtgaggagtacgagccgacaaga  
tccccccacgctacaaagattttcgtcaacggtagctgggttggtgttcacgaccccc  
aagcatctcgtgaatcaggtccttgacacaagacgaaagtcttacgtgcagttcgaagta  
tcacttggtcgtgatataccgagaccgtgaattcaagattttctcagacgctggccgtgtc  
atgagacccgtctttacagttcatcaggaggatgactatgagaacaacatcaccaaggga  
caactagtgttgacaaaaggaccatgtcaataggctagcccaagaacaggcagagcctcct  
gccaacccagcggacaagtttggtatgggtatggcttgatccgcgaaggagctgtcagat  
ctcgatgctgaggaagaagagacagccatgatttgcatgacgccagaggatctcgaactt  
taccgtgagcaaaaagaatgatgaagctacactcacagaagaagagaaaacgggccaagcaa  
gaggcagagaagagagaacaagaggaggaccgcaacaagcgattgaagacaaaggtgaac  
cccacaactcacatgtacacacattgtgagattcaccccagtatgattctcggtatctgt  
gccagtatcattc

>NL\_FOA05

catttgcgctcgaaccaataactcccatcggacgagatggtaaattggccaagcctcgacag  
cttcacaacactcactggggttttggtgtgtcctgccgaaacacccgaggggtcaagcttgt  
gggtctgggtcaaaaacttggtctctgatgtgttacgtcagtggttggtctccggccgatcct  
ctgattgaattcatgatcaacagagggcatggaagtcggtgaggagtacgagccgacaaga  
tccccccacgctacaaagattttcgtcaacggtagctgggttggtgttcacgaccccc  
aagcatctcgtgaatcaggtccttgacacaaggcgaaagtcttacgtgcagttcgaagta  
tcacttggtcgtgatataccgagaccgtgaattcaagattttctcagacgctggccgtgtc  
atgagacccgtctttacagttcatcaggaggatgactatgagaacaacatcaccaaggga  
caactagtgttgacaaaaggaccatgtcaataggctagcccaagagcaggcagagcctcct  
gccaacccagcggacaagtttggtatgggtatggcttgatccgcgaaggagctgtcagat  
ctcgatgctgaggaagaagagacagccatgatttgcatgacgccagaggatctcgaactt  
taccgtgagcaaaaagaatgatgaagctacactcacagaagaagagaaaacgggccaagcaa  
gaggcagagaagaggaacaagaggaggaccgcaacaagcgattgaagacaaaggtgaac  
cccacaactcacatgtacacacattgtgagattcaccccagtatgattctcggtatctgt  
gccagtatcattc

>SP\_FOA01

catttgcgctcgaaccaataactcccatcggacgagatggtaaattggccaagcctcgacag  
cttcacaacactcactggggttttggtgtgtcctgccgaaacacctgaggggtcaagcttgt  
gggtctgggtcaaaaacttggtctctaattgtgttacgtcagtgctcggtctccagccgatcct  
ctgattgaattcatgatcaacagagggcatggaagtcggtgaggagtacgagccgacaaga  
tccccccacgctacaaagattttcgtcaacggtagctgggttggtgttcacgaccccc  
aagcatctcgtgaatcaggtccttgacacaagacgaaagtcttacgtgcagttcgaagta  
tcacttggtcgtgatataccgagaccgtgaattcaagattttctcagacgctggccgtgtc  
atgagacccgtctttacagttcatcaggaggatgactatgagaacaacatcaccaaggga  
caactagtgttgacaaaaggaccatgtcaataggctagcccaagaacaggcagagcctcct  
gccaacccagcggacaagtttggtatgggtatggcttgatccgcgaaggagctgtcagat  
ctcgatgctgaggaagaagagacagccatgatttgcatgacgccagaggatctcgaactt  
taccgtgagcaaaaagaatgatgaagctacactcacagaagaagagaaaacgggccaagcaa  
gaggcagagaagagagaacaagaggaggaccgcaacaagcgattgaagacaaaggtgaac

cccacaactcacatgtacacacattgtgagattcaccccagtatgattctcggtatctgt  
gccagtatcattc

>SP\_FOA02

catttgcgtcgaaccaataactcccatcggacgagatggtaaattggccaagcctcgacag  
cttcacaacactcactgggggtttggtgtgtcctgccgaaacacctgagggtaagcttgt  
ggtctgggtcaaaaacttgtctctaattgtgttacgtcagtgctcggtctctccagccgatcct  
ctgattgaattcatgatcaacagagggcatggaagtcgttgaggagtacgagccgacaaga  
tccccccacgctacaaagattttcgtcaacggtagctgggttggtgttcatgccgacccc  
aagcatctcgtgaatcaggtccttggacacaagacgaaagtcttacgtgcagttcgaagta  
tcacttggttcgtgatatccgagaccgtgaattcaagattttctcagacgctggccgtgtc  
atgagaccggtctttacagttcatcaggaggatgactatgagaacaacatcaccaaggga  
caactagtgttgacaaaggaccatgtcaataggctagcccaagaacaggcagagcctcct  
gccaacccagcggacaaagtttggatgggatggcttgatccgcgaaggagctgtcgagtat  
ctcgatgctgaggaagaagagacagccatgatttgcagtgacgccagaggatctcgaactt  
taccgtgagcaaaaagaatgatgaagctacactcacagaagaagagaaaacgggccaagcaa  
gaggcagagaagagagaacaagaggaggaccgcaacaagcgattgaagacaaaggtgaac  
cccacaactcacatgtacacacattgtgagattcaccccagtatgattctcggtatctgt  
gccagtatcattc

>SP\_FOA03

catttgcgtcgaaccaataactcccatcggacgagatggtaaattggccaagcctcgacag  
cttcacaacactcactgggggtttggtgtgtcctgccgaaacacctgagggtaagcttgt  
ggtctgggtcaaaaacttgtctctaattgtgttacgtcagtgctcggtctctccagccgatcct  
ctgattgaattcatgatcaacagagggcatggaagtcgttgaggagtacgagccgacaaga  
tccccccacgctacaaagattttcgtcaacggtagctgggttggtgttcatgccgacccc  
aagcatctcgtgaatcaggtccttggacacaagacgaaagtcttacgtgcagttcgaagta  
tcacttggttcgtgatatccgagaccgtgaattcaagattttctcagacgctggccgtgtc  
atgagaccggtctttacagttcatcaggaggatgactatgagaacaacatcaccaaggga  
caactagtgttgacaaaggaccatgtcaataggctagcccaagaacaggcagagcctcct  
gccaacccagcggacaaagtttggatgggatggcttgatccgcgaaggagctgtcgagtat  
ctcgatgctgaggaagaagagacagccatgatttgcagtgacgccagaggatctcgaactt  
taccgtgagcaaaaagaatgatgaagctacactcacagaagaagagaaaacgggccaagcaa  
gaggcagagaagagagaacaagaggaggaccgcaacaagcgattgaagacaaaggtgaac  
cccacaactcacatgtacacacattgtgagattcaccccagtatgattctcggtatctgt  
gccagtatcattc

>SP\_FOA04

catttgcgtcgaaccaataactcccatcggacgagatggtaaattggccaagcctcgacag  
cttcacaacactcactgggggtttggtgtgtcctgccgaaacacctgagggtaagcttgt  
ggtctgggtcaaaaacttgtctctaattgtgttacgtcagtgctcggtctctccagccgatcct  
ctgattgaattcatgatcaacagagggcatggaagtcgttgaggagtacgagccgacaaga  
tccccccacgctacaaagattttcgtcaacggtagctgggttggtgttcatgccgacccc  
aagcatctcgtgaatcaggtccttggacacaagacgaaagtcttacgtgcagttcgaagta  
tcacttggttcgtgatatccgagaccgtgaattcaagattttctcagacgctggccgtgtc  
atgagaccggtctttacagttcatcaggaggatgactatgagaacaacatcaccaaggga  
caactagtgttgacaaaggaccatgtcaataggctagcccaagaacaggcagagcctcct  
gccaacccagcggacaaagtttggatgggatggcttgatccgcgaaggagctgtcgagtat  
ctcgatgctgaggaagaagagacagccatgatttgcagtgacgccagaggatctcgaactt  
taccgtgagcaaaaagaatgatgaagctacactcacagaagaagagaaaacgggccaagcaa  
gaggcagagaagagagaacaagaggaggaccgcaacaagcgattgaagacaaaggtgaac  
cccacaactcacatgtacacacattgtgagattcaccccagtatgattctcggtatctgt  
gccagtatcattc

>SP\_FOA05

catttgcgtcgaaccaataactcccatcggacgagatggtaaattggccaagcctcgacag  
cttcacaacactcactgggggtttggtgtgtcctgccgaaacacctgagggtaagcttgt  
ggtctgggtcaaaaacttgtctctaattgtgttacgtcagtgctcggtctctccagccgatcct  
ctgattgaattcatgatcaacagagggcatggaagtcgttgaggagtacgagccgacaaga  
tccccccacgctacaaagattttcgtcaacggtagctgggttggtgttcatgccgacccc  
aagcatctcgtgaatcaggtccttggacacaagacgaaagtcttacgtgcagttcgaagta  
tcacttggttcgtgatatccgagaccgtgaattcaagattttctcagacgctggccgtgtc  
atgagaccggtctttacagttcatcaggaggatgactatgagaacaacatcaccaaggga  
caactagtgttgacaaaggaccatgtcaataggctagcccaagaacaggcagagcctcct  
gccaacccagcggacaaagtttggatgggatggcttgatccgcgaaggagctgtcgagtat

ctcgatgctgaggaagaagagacagccatgatttgcacgacccagaggatctcgaactt  
taccgtgagcaaaaagaatgatgaagctacactcacagaagaagagaaaacgggccaagcaa  
gaggcagagaagagagaacaagaggaggaccgcaacaagcgattgaagacaaaggtgaac  
cccacaactcacatgtacacacattgtgagattcaccgccagtatgattctcggtatctgt  
gccagtatcattc

>SP\_FOA06

catttgcgtcgaaccaataactcccatcggacgagatggtaaattggccaagcctcgacag  
cttcacaacactcactggggtttgggtgtgtcctgccgaaacacctgaggggtcaagcttgt  
ggctctgggtcaaaaacttgtctctaattgtgttacgtcagtgctggctctccagccgatcct  
ctgattgaattcatgatcaacagaggcatggaagtcgttgaggagtagcagagccgacaaga  
tacccccacgctacaaaagattttcgtcaacggtagctgggttgggtgttcacatgccgacccc  
aagcatctcgtgaatcaggtccttggaacacaagacgaaagtcttacgtgcagttcgaagta  
tcacttgttctgtagatatccgagaccgtgaattcaagattttctcagacgctggccgtgtc  
atgagacccgtctttacagttcatcaggaggatgactatgagaacaacatcaccaaggga  
caactagtgttgacaaaaggaccatgtcaataggctagcccaagaacaggcagagcctcct  
gccaacccagcggacaagtttggatgggatggcttgatccgcgaaggagctgtcgagtat  
ctcgatgctgaggaagaagagacagccatgatttgcacgacccagaggatctcgaactt  
taccgtgagcaaaaagaatgatgaagctacactcacagaagaagagaaaacgggccaagcaa  
gaggcagagaagagagaacaagaggaggaccgcaacaagcgattgaagacaaaggtgaac  
cccacaactcacatgtacacacattgtgagattcaccgccagtatgattctcggtatctgt  
gccagtatcattc

>SP\_FOA07

catttgcgtcgaaccaataactcccatcggacgagatggtaaattggccaagcctcgacag  
cttcacaacactcactggggtttgggtgtgtcctgccgaaacacctgaggggtcaagcttgt  
ggctctgggtcaaaaacttgtctctgatgtgttacgtcagtggttggctctccggccgatcct  
ctgattgaattcatgatcaacagaggcatggaagtcgttgaggagtagcagagccgacaaga  
tacccccacgctacaaaagattttcgtcaacggtagctgggttgggtgttcacatgccgacccc  
aagcatctcgtgaatcaggtccttggaacacaagcgaaagtcttacgtgcagttcgaagta  
tcacttgttctgtagatatccgagaccgtgaattcaagattttctcagacgctggccgtgtc  
atgagacccgtctttacagttcatcaggaggatgactatgagaacaacatcaccaaggga  
caactagtgttgacaaaaggaccatgtcaataggctagcccaagagcaggcagagcctcct  
gccaacccagcggacaagtttggatgggatggcttgatccgcgaaggagctgtcgagtat  
ctcgatgctgaggaagaagagacagccatgatttgcacgacccagaggatctcgaactt  
taccgtgagcaaaaagaatgatgaagctacactcacagaagaagagaaaacgggccaagcaa  
gaggcagagaagagggaacaagaggaggaccgcaacaagcgattgaagacaaaggtgaac  
cccacaactcacatgtacacacattgtgagattcaccgccagtatgattctcggtatctgt  
gccagtatcattc

>SP\_FOA08

catttgcgtcgaaccaataactcccatcggacgagatggtaaattggccaagcctcgacag  
cttcacaacactcactggggtttgggtgtgtcctgccgaaacacctgaggggtcaagcttgt  
ggctctgggtcaaaaacttgtctctgatgtgttacgtcagtggttggctctccggccgatcct  
ctgattgaattcatgatcaacagaggcatggaagtcgttgaggagtagcagagccgacaaga  
tacccccacgctacaaaagattttcgtcaacggtagctgggttgggtgttcacatgccgacccc  
aagcatctcgtgaatcaggtccttggaacacaagcgaaagtcttacgtgcagttcgaagta  
tcacttgttctgtagatatccgagaccgtgaattcaagattttctcagacgctggccgtgtc  
atgagacccgtctttacagttcatcaggaggatgactatgagaacaacatcaccaaggga  
caactagtgttgacaaaaggaccatgtcaataggctagcccaagagcaggcagagcctcct  
gccaacccagcggacaagtttggatgggatggcttgatccgcgaaggagctgtcgagtat  
ctcgatgctgaggaagaagagacagccatgatttgcacgacccagaggatctcgaactt  
taccgtgagcaaaaagaatgatgaagctacactcacagaagaagagaaaacgggccaagcaa  
gaggcagagaagagggaacaagaggaggaccgcaacaagcgattgaagacaaaggtgaac  
cccacaactcacatgtacacacattgtgagattcaccgccagtatgattctcggtatctgt  
gccagtatcattc

>SP\_FOA09

catttgcgtcgaaccaataactcccatcggacgagatggtaaattggccaagcctcgacag  
cttcacaacactcactggggtttgggtgtgtcctgccgaaacacctgaggggtcaagcttgt  
ggctctgggtcaaaaacttgtctctgatgtgttacgtcagtggttggctctccggccgatcct  
ctgattgaattcatgatcaacagaggcatggaagtcgttgaggagtagcagagccgacaaga  
tacccccacgctacaaaagattttcgtcaacggtagctgggttgggtgttcacatgccgacccc  
aagcatctcgtgaatcaggtccttggaacacaagcgaaagtcttacgtgcagttcgaagta  
tcacttgttctgtagatatccgagaccgtgaattcaagattttctcagacgctggccgtgtc



atgagacccgtctttacagttcatcaggaggatgactatgagaacaacatcaccaagga  
caactagtgttgacaaaggaccatgtcaataggctagcccaagagcaggcagagcctcct  
gccaacccagcgggacaagtttggtatgggatggcttgatccgcgaaggagctgtcgagtat  
ctcgatgctgaggaagaagagacagccatgatttgcacgacgagcagagctcgaactt  
taccgtgagcaaaagaatgatgaagctacactcacagaagaagagaaaacgggccaagcaa  
gaggcagagaagagagaacaagaggaggaccgcaacaagcgattgaagacaaaggtgaac  
cccacaactcacatgtacacacattgtgagattcaccccagtatgattctcggtatctgt  
gccagtatcattc

>SP\_FOA10

catttgcgctgaaccaataactcccatcggacgagatggtaaattggccaagcctcgacag  
cttcacaacactcactggggttttggtgtgtcctgccgaaacacctgaggggtcaagcttgt  
ggctctgggtcaaaaacttgtctctaattgtgttacgtcagtgctcggtctccagccgatcct  
ctgattgaattcatgatcaacagaggcatggaagtcggtgaggagtacgagccgacaaga  
tccccccacgctacaaagattttcgtcaacggtagctgggttggtgttcacgaccccc  
aagcatctcgtgaatcaggtccttgacacacaagacgaaagtcttacgtgcagttcgaagta  
tcacttggtcgtgatataccgagaccgtgaattcaagattttctcagacgctggcctgtgc  
atgagacccgtctttacagttcatcaggaggatgactatgagaacaacatcaccaagga  
caactagtgttgacaaaggaccatgtcaataggctagcccaagaacaggcagagcctcct  
gccaacccagcgggacaagtttggtatgggatggcttgatccgcgaaggagctgtcgagtat  
ctcgatgctgaggaagaagagacagccatgatttgcacgacgagcagagctcgaactt  
taccgtgagcaaaagaatgatgaagctacactcacagaagaagagaaaacgggccaagcaa  
gaggcagagaagagagaacaagaggaggaccgcaacaagcgattgaagacaaaggtgaac  
cccacaactcacatgtacacacattgtgagattcaccccagtatgattctcggtatctgt  
gccagtatcattc

>SP\_FOA11

catttgcgctgaaccaataactcccatcggacgagatggtaaattggccaagcctcgacag  
cttcacaacactcactggggttttggtgtgtcctgccgaaacacccgaggggtcaagcttgt  
ggctctgggtcaaaaacttgtctctgatgtgttacgtcagtggttggtctccgcccgatcct  
ctgattgaattcatgatcaacagaggcatggaagtcggtgaggagtacgagccgacaaga  
tccccccacgctacaaagattttcgtcaacggtagctgggttggtgttcacgaccccc  
aagcatctcgtgaatcaggtccttgacacacaaggcgaagtccttacgtgcagttcgaagta  
tcacttggtcgtgatataccgagaccgtgaattcaagattttctcagacgctggcctgtgc  
atgagacccgtctttacagttcatcaggaggatgactatgagaacaacatcaccaagga  
caactagtgttgacaaaggaccatgtcaataggctagcccaagagcaggcagagcctcct  
gccaacccagcgggacaagtttggtatgggatggcttgatccgcgaaggagctgtcgagtat  
ctcgatgctgaggaagaagagacagccatgatttgcacgacgagcagagctcgaactt  
taccgtgagcaaaagaatgatgaagctacactcacagaagaagagaaaacgggccaagcaa  
gaggcagagaagaggggaacaagaggaggaccgcaacaagcgattgaagacaaaggtgaac  
cccacaactcacatgtacacacattgtgagattcaccccagtatgattctcggtatctgt  
gccagtatcattc

>SP\_FOA12

catttgcgctgaaccaataactcccatcggacgagatggtaaattggccaagcctcgacag  
cttcacaacactcactggggttttggtgtgtcctgccgaaacacccgaggggtcaagcttgt  
ggctctgggtcaaaaacttgtctctgatgtgttacgtcagtggttggtctccgcccgatcct  
ctgattgaattcatgatcaacagaggcatggaagtcggtgaggagtacgagccgacaaga  
tccccccacgctacaaagattttcgtcaacggtagctgggttggtgttcacgaccccc  
aagcatctcgtgaatcaggtccttgacacacaaggcgaagtccttacgtgcagttcgaagta  
tcacttggtcgtgatataccgagaccgtgaattcaagattttctcagacgctggcctgtgc  
atgagacccgtctttacagttcatcaggaggatgactatgagaacaacatcaccaagga  
caactagtgttgacaaaggaccatgtcaataggctagcccaagagcaggcagagcctcct  
gccaacccagcgggacaagtttggtatgggatggcttgatccgcgaaggagctgtcgagtat  
ctcgatgctgaggaagaagagacagccatgatttgcacgacgagcagagctcgaactt  
taccgtgagcaaaagaatgatgaagctacactcacagaagaagagaaaacgggccaagcaa  
gaggcagagaagaggggaacaagaggaggaccgcaacaagcgattgaagacaaaggtgaac  
cccacaactcacatgtacacacattgtgagattcaccccagtatgattctcggtatctgt  
gccagtatcattc

>SP\_FOA13

catttgcgctgaaccaataactcccatcggacgagatggtaaattggccaagcctcgacag  
cttcacaacactcactggggttttggtgtgtcctgccgaaacacctgaggggtcaagcttgt  
ggctctgggtcaaaaacttgtctctaattgtgttacgtcagtgctcggtctccagccgatcct  
ctgattgaattcatgatcaacagaggcatggaagtcggtgaggagtacgagccgacaaga

tacccccacgctacaaaagatttttcgtcaacggtagctgggttggtgttcacgaccccc  
aagcatctcgtgaatcaggtccttggacacaagacgaaagtcttacgtgcagttcgaagta  
tcacttggtcgtgatataccgagaccgtgaattcaagattttctcagacgctggccgtgtc  
atgagaccccgcttttacagttcatcaggaggatgactatgagaacaacatcaccaaggga  
caactagtgttgacaaaaggaccatgtcaataggctagcccaagaacaggcagagcctcct  
gccaacccagcggacaagtttggatgggatggcttgatccgcgaaggagctgtcgagtat  
ctcgatgctgaggaagaagagacagccatgatttgcacgacccagaggatctcgaactt  
taccgtgagcaaaaagaatgatgaagctacactcacagaagaagagaaaacgggccaagcaa  
gaggcagagaagagagaacaagaggaggaccgcaacaagcgattgaagacaaaggtgaac  
cccacaactcacatgtacacacattgtgagattcaccaccagtatgattctcggtatctgt  
gccagtatcattc

>SP\_FOA14

catttgcgctgaaccaataactcccatcggacgagatggtaaattggccaagcctcgacag  
cttcacaacactcactggggttttggtgtgtcctgccgaaacacctgagggtaagcttgt  
ggctcgtggtcaaaaacttgtctctaattgtgttacgtcagtgctcggtctccagccgatcct  
ctgattgaattcatgatcaacagaggcatggaagtcgttgaggagtacgagccgacaaga  
tacccccacgctacaaaagatttttcgtcaacggtagctgggttggtgttcacgaccccc  
aagcatctcgtgaatcaggtccttggacacaagacgaaagtcttacgtgcagttcgaagta  
tcacttggtcgtgatataccgagaccgtgaattcaagattttctcagacgctggccgtgtc  
atgagaccccgcttttacagttcatcaggaggatgactatgagaacaacatcaccaaggga  
caactagtgttgacaaaaggaccatgtcaataggctagcccaagaacaggcagagcctcct  
gccaacccagcggacaagtttggatgggatggcttgatccgcgaaggagctgtcgagtat  
ctcgatgctgaggaagaagagacagccatgatttgcacgacccagaggatctcgaactt  
taccgtgagcaaaaagaatgatgaagctacactcacagaagaagagaaaacgggccaagcaa  
gaggcagagaagagagaacaagaggaggaccgcaacaagcgattgaagacaaaggtgaac  
cccacaactcacatgtacacacattgtgagattcaccaccagtatgattctcggtatctgt  
gccagtatcattc

>SP\_FOA15

catttgcgctgaaccaataactcccatcggacgagatggtaaattggccaagcctcgacag  
cttcacaacactcactggggttttggtgtgtcctgccgaaacacctgagggtaagcttgt  
ggctcgtggtcaaaaacttgtctctaattgtgttacgtcagtgctcggtctccagccgatcct  
ctgattgaattcatgatcaacagaggcatggaagtcgttgaggagtacgagccgacaaga  
tacccccacgctacaaaagatttttcgtcaacggtagctgggttggtgttcacgaccccc  
aagcatctcgtgaatcaggtccttggacacaagacgaaagtcttacgtgcagttcgaagta  
tcacttggtcgtgatataccgagaccgtgaattcaagattttctcagacgctggccgtgtc  
atgcgaccccgcttttacagttcatcaggaggatgactatgagaacaacatcaccaaggga  
caactagtgttgacaaaaggaccatgtcaataggctagcccaagaacaggcagagcctcct  
gccaacccagcggacaagtttggatgggatggcttgatccgcgaaggagctgtcgagtat  
ctcgatgctgaggaagaagagacagccatgatttgcacgacccagaggatctcgaactt  
taccgtgagcaaaaagaatgatgaagctacactcacagaagaagagaaaacgggccaagcaa  
gaggcagagaagagagaacaagaggaggaccgcaacaagcgattgaagacaaaggtgaac  
cccacaactcacatgtacacacattgtgagattcaccctagtatgattctcggtatctgt  
gccagtatcattc

>SP\_FOA16

catttgcgctgaaccaataactcccatcggacgagatggtaaattggccaagcctcgacag  
cttcacaacactcactggggttttggtgtgtcctgccgaaacacctgagggtaagcttgt  
ggctcgtggtcaaaaacttgtctctaattgtgttacgtcagtgctcggtctccagccgatcct  
ctgattgaattcatgatcaacagaggcatggaagtcgttgaggagtacgagccgacaaga  
tacccccacgctacaaaagatttttcgtcaacggtagctgggttggtgttcacgaccccc  
aagcatctcgtgaatcaggtccttggacacaagacgaaagtcttacgtgcagttcgaagta  
tcacttggtcgtgatataccgagaccgtgaattcaagattttctcagacgctggccgtgtc  
atgcgaccccgcttttacagttcatcaggaggatgactatgagaacaacatcaccaaggga  
caactagtgttgacaaaaggaccatgtcaataggctagcccaagaacaggcagagcctcct  
gccaacccagcggacaagtttggatgggatggcttgatccgcgaaggagctgtcgagtat  
ctcgatgctgaggaagaagagacagccatgatttgcacgacccagaggatctcgaactt  
taccgtgagcaaaaagaatgatgaagctacactcacagaagaagagaaaacgggccaagcaa  
gaggcagagaagagagaacaagaggaggaccgcaacaagcgattgaagacaaaggtgaac  
cccacaactcacatgtacacacattgtgagattcaccctagtatgattctcggtatctgt  
gccagtatcattc

>SP\_FOA17

catttgcgctgaaccaataactcccatcggacgagatggtaaattggccaagcctcgacag

cttcacaacactcactgggggtttggtgtgtcctgccgaaacacctgaggggtcaagcttgt  
gggtctgggtcaaaaacttgtctctaattgtgttacgtcagtgctcggtctctccagccgatcct  
ctgattgaattcatgatcaacagaggcatggaagtcgttgaggagtacgagccgacaaga  
tccccccacgctacaaagattttcgtcaacggtagctgggttgggtgttcatgccgacccc  
aagcatctcgtgaatcaggtccttggacacaagacgaaagtcttacgtgcagttcgaagta  
tcacttgttctgtgatataccgagaccgtgaattcaagattttctcagacgctggccgtgtc  
atgcgacccgtctttacagttcatcaggaggatgactatgagaacaacatcaccaaggga  
caactagtgttgacaaaggaccatgtcaataggctagcccaagaacaggcagagcctcct  
gccaaaccagcggacaagtttggatgggatggcttgatccgcgaaggagctgtcagat  
ctcgatgctgaggaagaagagacagccatgatttgcagtgacgccagaggatctcgaactt  
taccgtgagcaaaaagaatgatgaagctacactcacagaagaagagaaaacggggccaagcaa  
gaggcagagaagagagagaacaagaggaggaccgcaacaagcgattgaagacaaaggtgaac  
cccacaactcacatgtacacacattgtgagattcacccctagtatgattctcggtatctgt  
gccagtatcattc

>SP\_FOA18

catttgcgtcgaaccaataactcccatcggacgagatggtaaattggccaagcctcgacag  
cttcacaacactcactgggggtttggtgtgtcctgccgaaacacctgaggggtcaagcttgt  
gggtctgggtcaaaaacttgtctctaattgtgttacgtcagtgctcggtctctccagccgatcct  
ctgattgaattcatgatcaacagaggcatggaagtcgttgaggagtacgagccgacaaga  
tccccccacgctacaaagattttcgtcaacggtagctgggttgggtgttcatgccgacccc  
aagcatctcgtgaatcaggtccttggacacaagacgaaagtcttacgtgcagttcgaagta  
tcacttgttctgtgatataccgagaccgtgaattcaagattttctcagacgctggccgtgtc  
atgcgacccgtctttacagttcatcaggaggatgactatgagaacaacatcaccaaggga  
caactagtgttgacaaaggaccatgtcaataggctagcccaagaacaggcagagcctcct  
gccaaaccagcggacaagtttggatgggatggcttgatccgcgaaggagctgtcagat  
ctcgatgctgaggaagaagagacagccatgatttgcagtgacgccagaggatctcgaactt  
taccgtgagcaaaaagaatgatgaagctacactcacagaagaagagaaaacggggccaagcaa  
gaggcagagaagagagagaacaagaggaggaccgcaacaagcgattgaagacaaaggtgaac  
cccacaactcacatgtacacacattgtgagattcacccctagtatgattctcggtatctgt  
gccagtatcattc

>SP\_FOA19

catttgcgtcgaaccaataactcccatcggacgagatggtaaattggccaagcctcgacag  
cttcacaacactcactgggggtttggtgtgtcctgccgaaacacctgaggggtcaagcttgt  
gggtctgggtcaaaaacttgtctctaattgtgttacgtcagtgctcggtctctccagccgatcct  
ctgattgaattcatgatcaacagaggcatggaagtcgttgaggagtacgagccgacaaga  
tccccccacgctacaaagattttcgtcaacggtagctgggttgggtgttcatgccgacccc  
aagcatctcgtgaatcaggtccttggacacaagacgaaagtcttacgtgcagttcgaagta  
tcacttgttctgtgatataccgagaccgtgaattcaagattttctcagacgctggccgtgtc  
atgcgacccgtctttacagttcatcaggaggatgactatgagaacaacatcaccaaggga  
caactagtgttgacaaaggaccatgtcaataggctagcccaagaacaggcagagcctcct  
gccaaaccagcggacaagtttggatgggatggcttgatccgcgaaggagctgtcagat  
ctcgatgctgaggaagaagagacagccatgatttgcagtgacgccagaggatctcgaactt  
taccgtgagcaaaaagaatgatgaagctacactcacagaagaagagaaaacggggccaagcaa  
gaggcagagaagagagagaacaagaggaggaccgcaacaagcgattgaagacaaaggtgaac  
cccacaactcacatgtacacacattgtgagattcacccctagtatgattctcggtatctgt  
gccagtatcattc

>SP\_FOA20

catttgcgtcgaaccaataactcccatcggacgagatggtaaattggccaagcctcgacag  
cttcacaacactcactgggggtttggtgtgtcctgccgaaacacctgaggggtcaagcttgt  
gggtctgggtcaaaaacttgtctctaattgtgttacgtcagtgctcggtctctccagccgatcct  
ctgattgaattcatgatcaacagaggcatggaagtcgttgaggagtacgagccgacaaga  
tccccccacgctacaaagattttcgtcaacggtagctgggttgggtgttcatgccgacccc  
aagcatctcgtgaatcaggtccttggacacaagacgaaagtcttacgtgcagttcgaagta  
tcacttgttctgtgatataccgagaccgtgaattcaagattttctcagacgctggccgtgtc  
atgcgacccgtctttacagttcatcaggaggatgactatgagaacaacatcaccaaggga  
caactagtgttgacaaaggaccatgtcaataggctagcccaagaacaggcagagcctcct  
gccaaaccagcggacaagtttggatgggatggcttgatccgcgaaggagctgtcagat  
ctcgatgctgaggaagaagagacagccatgatttgcagtgacgccagaggatctcgaactt  
taccgtgagcaaaaagaatgatgaagctacactcacagaagaagagaaaacggggccaagcaa  
gaggcagagaagagagagaacaagaggaggaccgcaacaagcgattgaagacaaaggtgaac  
cccacaactcacatgtacacacattgtgagattcacccctagtatgattctcggtatctgt

gccagtatcattc

### S3: Final alignments in FASTA format (RPB2);

```
>fusarium_proliferatum_et1_gca_900067095
gagatgaaccttcacgtcccccagagtgaggaaacacgtgctgaggttaaagagctttgt
ctagtcacctgaacattgtctctcctcagaagaacggtcctttgatgggtatcgccag
gactctctggctggtgcctacaagctttgccgtcgagatgttttcctcacaaggagcaa
atcatgaactgtatgctctgggtgccaactgggacggtgtcattcctcagcccgctatc
tataagcctcgctcctcggtggactggtaagcagcttatcagcatggtcatccctaaggag
gtaagcctggtcaatgggtacggattctggtgaaaacgccccctttaaggacgagggctct
ctgatccaagccggccaactgatgtatggtcttttgactaagaagaacattggtgctgct
gcgggcggtattgtgcataatcagctacaacgaacttgccccgaaggtgcatggctttc
ctgaacggtgtccagcaggtgtcacctactggcttctcaacaatggtcatagcattggt
attggtgatacaattcccgatgcggcgaccattgctaaagtcaggtgcacattgacgag
gaaaaggctgaagttgctcgcttgacagcaatggccacagcgaacgagcttgaggctcta
ccaggtatgaacggttcgtgcaaccttcgaaaacaaggtctccatggctctgaatcaggcc
cgtgataaggctggtaccacaacacagaagagtttgaaggattcaaacaacgctgtcacc
atggcttcctcaggttccaagggttcatctatcaatatttctcaaatgactgcgcttgct
ggtcagcaaatgttgaaggcaagcgatttcctttcggtttcaagtatcgacattacct
cattcaccaaggac
>fusarium_oxysporum_fo47_gca_000271705
gagatgaaccttcacgtcccccagagtgaggaaacgcgcgctgaggttaaagagctttgt
ctagtcacctgaacattgtctctcctcagaagaacggtcctttgatgggtatcgccag
gactctctggctggtgcctacaagctttgccgtcgagatgttttcctcacaaggagcaa
atcatgaactgtatgctctgggtgccaactgggacggtgtcattcctcaaccgctatc
tataagcctcgctcctcggtggactggtaagcagcttatcagcatggttatccctaaggag
gttagcctggtcaacgggtacggattctggcgaaaacgccccctttaaggacgagggctct
ctgatccaagccggccaactgatgtatggtcttttaactaagaagaacattggtgctgct
gcggggtggtattgtgcataatcagctacaacgaacttgccccgaaggtgcatggctttc
ttaaagggtgtccagcaggtgtcacctactggcttctcaacaatggtcatagcattggt
attggtgatacaattcccgatgcggcgaccattgctaaagttcaggtacatattgatgag
gaaaaggctgaagttgctcgcttgacagcaatggccacagcgaatgagcttgaggcccta
cctgggtatgaacggttcgtgcaaccttcgaaaacaaggtctccatggctctgaaccaggcc
cgtgataaggctggtaccacaacacagaagagtttgaaggattcaaacaacgctgtcacc
atggcttcctcaggttccaagggttcatctatcaatatttctcaaatgactgcgcttgct
ggtcagcaaatgtcgaaggcaagcgatttccttttggtttcaagtatcgacattacct
cattcaccaaggac
>GASP_2 no comment
gagatgaaccttcacgtcccccagagtgaggaaacgcgcgctgaggttaaagagctttgt
ctagtcacctgaacattgtctctcctcagaagaacggtcctttgatgggtatcgccag
gactctctggctggtgcctacaagctttgccgtcgagatgttttcctcacaaggagcaa
atcatgaactgtatgctctgggtgccaactgggacggtgtcattcctcaaccgctatc
tataagcctcgctcctcggtggactggtaagcagcttatcagcatggttatccctaaggag
gttagcctggtcaacgggtacggattctggcgaaaacgccccctttaaggacgagggctct
ctgatccaagccggccaactgatgtatggtcttttaactaagaagaacattggtgctgct
gcggggtggtattgtgcataatcagctacaacgaacttgccccgaaggtgcatggctttc
ttaaagggtgtccagcaggtgtcacctactggcttctcaacaatggtcatagcattggt
attggtgatacaattcccgatgcggcgaccattgctaaagttcaggtacatattgatgag
gaaaaggctgaagttgctcgcttgacagcaatggccacagcgaatgagcttgaggcccta
cctgggtatgaacggttcgtgcaaccttcgaaaacaaggtctccatggctctgaaccaggcc
cgtgataaggctggtaccacaacacagaagagtttgaaggattcaaacaacgctgtcacc
atggcttcctcaggttccaagggttcatctatcaatatttctcaaatgactgcgcttgct
ggtcagcaaatgtcgaaggcaagcgatttccttttggtttcaagtatcgacattacct
cattcaccaaggac
>GASP_3 no comment
gagatgaaccttcacgtcccccagagtgaggaaacgcgcgctgaggttaaagagctttgt
ctagtcacctgaacattgtctctcctcagaagaacggtcctttgatgggtatcgccag
gactctctggctggtgcctacaagctttgccgtcgagatgttttcctcacaaggagcaa
```

atcatgaactgtatgctctgggtgcccactgggacggtgtcattcctcaacccgctatc  
tataagcctcgtcctcgggtggactggtaagcagcttatcagcatggttatccctaaggag  
gttagcctgttcaacgggtacggattctggcgaaaacgcccctcttaaggacgagggctctt  
ctgatccaagccggccaactgatgtatggctcttttaactaagaagaacattgggtgctgct  
gcggggtgggtattgtgcatatcagctacaacgaacttggccccgaaggtgcatggccttc  
ttaaacgggtgtccagcaggttgtcacctactggcttctcaacaatggtcatagcattgggt  
attgggtgatacaattcccgatgcggcgaccattgctaaagttcaggtacatattgatgag  
gaaaaggctgaagttgctcgcttgacagcaatggccacagcgaatgagcttgaggcccta  
cctgggtatgaacggttcgtgcaaccttcgaaaacaaagtctccatggctctgaaccaggcc  
cgtgataaggctgggtaccacaacacagaagagtttgaaggattcaaacaacgctgtcacc  
atggcttcctcaggttccaagggttcattctatcaatatttctcaaatgactgcgcttgct  
ggtcagcaaattgtcgaaggcaagcgtattccttttggtttcaagtatcgacattacct  
cacttcaccaaggac

>GASP\_4 no comment

gagatgaaccttcacgtcccccagagcgaggaaaacgcgcgctgaggttaaagagctttgt  
ctagttcccttgaacattgtctctcctcagaagaacgggtcctttgatgggtatcggtcag  
gactctctggctgggtgcctacaagctttgccgtcgagatgttttcctcacaaggagcaa  
atcatgaactgtatgctctgggtgcccactgggacggtgtcattcctcaacccgctatc  
tataagcctcgtcctcgggtggactggtaagcagcttatcagcatggttatccctaaggag  
gttagcctgttcaacgggtacggattctggcgaaaacgcccctcttaaggacgagggctctt  
ctgatccaagccggccaactgatgtatggctcttttaactaagaagaacattgggtgctgct  
gcggggtgggtattgtgcatatcagctacaacgaacttggccccgaaggtgcatggccttc  
ttaaacgggtgtccagcaggttgtcacctactggcttctcaacaatggtcatagcattgggt  
attgggtgatacaattcccgatgcggcgaccattgctaaagttcaggtacatattgatgag  
gaaaaggctgaagttgctcgcttgacagcaatggccacagcgaatgagcttgaggcccta  
cctgggt-----  
-----  
-----  
-----  
-----

>GASP\_5 no comment

gagatgaaccttcacgtccctcagagtgaggaaaacgcgcgctgaggttaaagagctttgt  
ctagttcccttgaacattgtctctcctcagaagaacgggtcctttgatgggtatcggtcag  
gactctctggctgggtgcctacaagctttgccgtcgagatgttttcctcacaaggagcaa  
atcatgaactgtatgctctgggtgcccactgggacggtgtcattcctcaacccgctatc  
tataagcctcgtcctcgggtggactggtaagcagcttatcagcatggttatccctaaggag  
gttagcctgttcaacgggtacggattctggcgaaaacgcccctcttaaggacgagggctctt  
ctgatccaagccggccaactgatgtatggctcttttaactaagaagaacattgggtgctgct  
gcggggtgggtattgtgcatatcagctacaacgaacttggccccgaaggtgcatggccttc  
ttaaacgggtgtccagcaggttgtcacctactggcttctcaacaatggtcatagcattgggt  
attgggtgatacaattcccgatgcggcgaccattgctaaagttcaggtacatattgatgag  
gaaaaggctgaagttgctcgcttgacagcaatggccacagcgaatgagcttgaggcccta  
cctgggtatgaacggttcgtgcaaccttcgaaaacaaagtctccatggctctgaaccaggcc  
cgtgataaggctgggtaccacaacacagaagagtttgaaggattcaaacaacgctgtcacc  
atggcttcctcaggttccaagggttcattctatcaatatttctcaaatgactgcgcttgct  
ggtcagcaaattggttgaaggcaagcgtattccttttggtttcaagtatcgacattacct  
cacttcaccaaggac

>GASP\_9 no comment

gagatgaaccttcacgtcccccagagtgaggaaaacgcgcgctgaggttaaagagctttgt  
ctagttcccttgaacattgtctctcctcagaagaacgggtcctttgatgggtatcggtcag  
gactctctggctgggtgcctacaagctttgccgtcgagatgttttcctcacaaggagcaa  
atcatgaactgtatgctctgggtgcccactgggacggtgtcattcctcaacccgctatc  
tataagcctcgtcctcgggtggactggtaagcagcttatcagcatggttatccctaaggag  
gttagcctgttcaacgggtacggattctggcgaaaacgcccctcttaaggacgagggctctt  
ctgatccaagccggccaactgatgtatggctcttttaactaagaagaacattgggtgctgct  
gcggggtgggtattgtgcatatcagctacaacgaacttggccccgaaggtgcatggccttc  
ttaaacgggtgtccagcaggttgtcacctactggcttctcaacaatggtcatagcattgggt  
attgggtgatacaattcccgatgcggcgaccattgctaaagttcaggtacatattgatgag  
gaaaaggctgaagttgctcgcttgacagcaatggccacagcgaatgagcttgaggcccta  
cctgggtatgaacggttcgtgcaaccttcgaaaacaaagtctccatggctctgaaccaggcc  
cgtgataaggctgggtaccacaacacagaagagtttgaaggattcaaacaacgctgtcacc

atggcttcctcaggttccaagggttcatctatcaatattttctcaaagactgcgcttgct  
ggtcagcaaattgtcgaaggcaagcgtattccttttggtttcaagtatcgacattacct  
cacttcaccaaggac

>GA\_1.2 no comment

gagatgaaccttcacgtccccagagtgaaggaaacgcgcgctgaggttaaagagctttgt  
ctagttcccttgaacattgtctctcctcagaagaacgggtcctttgatgggtatcgccag  
gactctctggctggtgcctacaagctttgccgtcgagatgttttctcacaaggagcaa  
atcatgaactgtatgctctgggtgcccaactgggacgggtgtcattcctcaaccgctatc  
tataagcctcgctcctcggtggactggtaagcagcttatcagcatggttatccctaaggag  
gttagcctgttcaacgggtacggattctggcgaaaacgcccctcttaaggacgagggctct  
ctgatccaagccggccaactgatgtatggtccttttaactaagaagaacattgggtgctgct  
gcgggtgggtattgtgcatatcagctacaacgaacttggccccgaagggtgcgatggctttc  
ttaaaccggtgtccagcaggttgtcacctactggcttctcaacaatgggtcatagcattgggt  
attgggtgatacaattcccgatgcggcgaccattgctaaagttcaggtacatattgatgag  
gaaaaggctgaagttgctcgcttgacagcaatggccacagcgaatgagcttgaggcccta  
cctgggtatgaacgcttcgtgcaaccttcgaaaacaaagtctccatggctctgaaccaggcc  
cgtgataaggctggtaccacaacacagaagagtttgaaggattcaaacaacgctgtcacc  
atggcttcctcaggttccaagggttcatctatcaatattttctcaaagactgcgcttgct  
ggtcagcaaattgtcgaaggcaagcgtattccttttggtttcaagtatcgacattacct  
cacttcaccaaggac

>GA\_1.3 no comment

-----tttgt  
ctagttcccttgaacattgtctctcctcagaagaacgggtcctttgatgggtatcgccag  
gactctctggctggtgcctacaagctttgccgtcgagatgttttctcacaaggagcaa  
atcatgaactgtatgctctgggtgcccaactgggacgggtgtcattcctcaaccgctatc  
tataagcctcgctcctcggtggactggtaagcagcttatcagcatggttatccctaaggag  
gttagcctgttcaacgggtacggattctggcgaaaacgcccctcttaaggacgagggctct  
ctgatccaagccggccaactgatgtatggtccttttaactaagaagaacattgggtgctgct  
gcgggtgggtattgtgcatatcagctacaacgaacttggccccgaagggtgcgatggctttc  
ttaaaccggtgtccagcaggttgtcacctactggcttctcaacaatgggtcatagcattgggt  
attgggtgatacaattcccgatgcggcgaccattgctaaagttcaggtacatattgatgag  
gaaaaggctgaagttgctcgcttgacagcaatggccacagcgaatgagcttgaggcccta  
cctgggtatgaacgcttcgtgcaaccttcgaaaacaaagtctccatggctctgaaccaggcc  
cgtgataaggctggtaccacaacacagaagagtttgaaggattcaaacaacgctgtcacc  
atggcttcctcaggttccaagggttcatctatcaatattttctcaaagactgcgcttgct  
ggtcagcaaattgtcgaaggcaagcgtattccttttggtttcaagtatcgacattacct  
cacttcaccaaggac

>GA\_1.4 no comment

gagatgaaccttcacgtccccagagtgaaggaaacgcgcgctgaggttaaagagctttgt  
ctagttcccttgaacattgtctctcctcagaagaacgggtcctttgatgggtatcgccag  
gactctctggctggtgcctacaagctttgccgtcgagatgttttctcacaaggagcaa  
atcatgaactgtatgctctgggtgcccaactgggacgggtgtcattcctcaaccgctatc  
tataagcctcgctcctcggtggactggtaagcagcttatcagcatggttatccctaaggag  
gttagcctgttcaacgggtacggattctggcgaaaacgcccctcttaaggacgagggctct  
ctgatccaagccggccaactgatgtatggtccttttaactaagaagaacattgggtgctgct  
gcgggtgggtattgtgcatatcagctacaacgaacttggccccgaagggtgcgatggctttc  
ttaaaccggtgtccagcaggttgtcacctactggcttctcaacaatgggtcatagcattgggt  
attgggtgatacaattcccgatgcggcgaccattgctaaagttcaggtacatattgatgag  
gaaaaggctgaagttgctcgcttgacagcaatggccacagcgaatgagcttgaggcccta  
cctgggtatgaacgcttcgtgcaaccttcgaaaacaaagtctccatggctctgaaccaggcc  
cgtgataaggctggtaccacaacacagaagagtttgaaggattcaaacaacgctgtcacc  
atggcttcctcaggttccaagggttcatctatcaatattttctcaaagactgcgcttgct  
ggtcagcaaattgtcgaaggcaagcgtattccttttggtttcaagtatcgacattacct  
cacttcaccaaggac

>GA\_10 no comment

gagatgaaccttcacgtccccagagtgaaggaaacgcgcgctgaggttaaagagctttgt  
ctagttcccttgaacattgtctctcctcagaagaacgggtcctttgatgggtatcgccag  
gactctctggctggtgcctacaagctttgccgtcgagatgttttctcacaaggagcaa  
atcatgaactgtatgctctgggtgcccaactgggacgggtgtcattcctcaaccgctatc  
tataagcctcgctcctcggtggactggtaagcagcttatcagcatggttatccctaaggag  
gttagcctgttcaacgggtacggattctggcgaaaacgcccctcttaaggacgagggctct

ctgatccaagccggccaactgatgtatggtcttttaactaagaagaacattggtgctgct  
gcggggtggtattgtgcatatcagctacaacgaacttggccccgaaggtgcatggctttc  
ttaaaccggtgtccagcaggttgtcacctactggcttctcaacaatggtcatagcattggt  
attggtgatacaattcccgatgcggcgaccatttgctaaagttcaggtacatattgatgag  
gaaaaggctgaagttgctcgcttgacagcaatggccacagcgaatgagcttgaggcccta  
cctggtatgaacggttcgtgcaaccttcgaaaaaaaagtctccatggctctgaaccaggcc  
cgtgataaggctggtaccacaacacagaagagtttgaaggattcaaacaacgctgtcacc  
atggcttcctcangttccaagggttcatctatcaatatttctcaaatgactgcgcttgct  
ggtcagcaaattgtcgaaggcaagcgtattccttttggtttcaagtatcgacattacct  
cacttnaccaaggac

>GA\_3.2 no comment

gagatgaaccttcacgtccccagagtgaggaaaacgcgcgctgaggttaaagagctttgt  
ctagttcccttgaacattgtctctcctcagaagaacggctcctttgatgggtatcgccag  
gactctctggctggtgcctacaagctttgccgtcgagatgttttctcacaaggagcaa  
atcatgaactgtatgctctgggtgccccaaactgggacgggtgtcattcctcaaccgcctatc  
tataagcctcgtcctcgggtggactggtaagcagcttatcagcatggttatccctaaggag  
gttagcctgttcaacgggtacggattctggcgaaaaacgccccctttaaggacgagggtcct  
ctgatccaagccggccaactgatgtatggtcttttaactaagaagaacattggtgctgct  
gcggggtggtattgtgcatatcagctacaacgaacttggccccgaaggtgcatggctttc  
ttaaaccggtgtccagcaggttgtcacctactggcttctcaacaatggtcatagcattggt  
attggtgatacaattcccgatgcggcgaccatttgctaaagttcaggtacatattgatgag  
gaaaaggctgaagttgctcgcttgacagcaatggccacagcgaatgagcttgaggcccta  
cctggtatgaacggttcgtgcaaccttcgaaaaaaaagtctccatggctctgaaccaggcc  
cgtgataaggctggtaccacaacacagaagagtttgaaggattcaaacaacgctgtcacc  
atggcttcctcaggttccaagggttcatctatcaatatttctcaaatgactgcgcttgct  
ggtcagcaaattgtcgaaggcaagcgtattccttttggtttcaagtatcgacattacct  
cacttcaccaaggac

>GA\_3.3 no comment

gagatgaaccttcacgtccccagagtgaggaaaacgcgcgctgaggttaaagagctttgt  
ctagttcccttgaacattgtctctcctcagaagaacggctcctttgatgggtatcgccag  
gactctctggctggtgcctacaagctttgccgtcgagatgttttctcacaaggagcaa  
atcatgaactgtatgctctgggtgccccaaactgggacgggtgtcattcctcaaccgcctatc  
tataagcctcgtcctcgggtggactggtaagcagcttatcagcatggttatccctaaggag  
gttagcctgttcaacgggtacggattctggcgaaaaacgccccctttaaggacgagggtcct  
ctgatccaagccggccaactgatgtatggtcttttaactaagaagaacattggtgctgct  
gcggggtggtattgtgcatatcagctacaacgaacttggccccgaaggtgcatggctttc  
ttaaaccggtgtccagcaggttgtcacctactggcttctcaacaatggtcatagcattggt  
attggtgatacaattcccgatgcggcgaccatttgctaaagttcaggtacatattgatgag  
gaaaaggctgaagttgctcgcttgacagcaatggccacagcgaatgagcttgaggcccta  
cctggtatgaacggttcgtgcaaccttcgaaaaaaaagtctccatggctctgaaccaggcc  
cgtgataaggctggtaccacaacacagaagagtttgaaggattcaaacaacgctgtcacc  
atggcttcctcaggttccaagggttcatctatcaatatttctcaaatgactgcgcttgct  
ggtcagcaaattgtcgaaggcaagcgtattccttttggtttcaagtatcgacattacct  
cacttcaccaaggac

>GA\_3.5 no comment

gagatgaaccttcacgtccccagagtgaggaaaacgcgcgctgaggttaaagagctttgt  
ctagttcccttgaacattgtctctcctcagaagaacggctcctttgatgggtatcgccag  
gactctctggctggtgcctacaagctttgccgtcgagatgttttctcacaaggagcaa  
atcatgaactgtatgctctgggtgccccaaactgggacgggtgtcattcctcaaccgcctatc  
tataagcctcgtcctcgggtggactggtaagcagcttatcagcatggttatccctaaggag  
gttagcctgttcaacgggtacggattctggcgaaaaacgccccctttaaggacgagggtcct  
ctgatccaagccggccaactgatgtatggtcttttaactaagaagaacattggtgctgct  
gcggggtggtattgtgcatatcagctacaacgaacttggccccgaaggtgcatggctttc  
ttaaaccggtgtccagcaggttgtcacctactggcttctcaacaatggtcatagcattggt  
attggtgatacaattcccgatgcggcgaccatttgctaaagttcaggtacatattgatgag  
gaaaaggctgaagttgctcgcttgacagcaatggccacagcgaatgagcttgaggcccta  
cctggtatgaacggttcgtgcaaccttcgaaaaaaaagtctccatggctctgaaccaggcc  
cgtgataaggctggtaccacaacacagaagagtttgaaggattcaaacaacgctgtcacc  
atggcttcctcaggttccaagggttcatctatcaatatttctcaaatgactgcgcttgct  
ggtcagcaaattgtcgaaggcaagcgtattccttttggtttcaagtatcgacattacct  
cacttcaccaaggac

>GA\_3.6 no comment

gagatgaaccttcacgtccccagagtgaggaaacgcgcgctgagggttaaagagctttgt  
ctagttcccttgaacattgtctctcctcagaagaacggtcctttgatgggtatcgtccag  
gactctctggctggtgcctacaagctttgccgtcgagatgttttcctcacaaggagcaa  
atcatgaactgtatgctctgggtgccccaaactgggacggtgtcattcctcaaccgctatc  
tataagcctcgtcctcggtaggactggtaagcagcttatcagcatggttatccctaaggag  
gttagcctgttcaacggtagcgattctggcgaaaacgcccctcttaaggacgagggctctt  
ctgatccaagccggccaactgatgtatggtcttttaactaagaagaacattggtgctgct  
gcgggtggtattgtgcatatcagctacaacgaacttggccccgaaggtgcatggtcttc  
ttaaaccggtgtccagcaggttgtcacctactggcttctcaacaatggtcatagcattggt  
attggtgatacaattcccgatgcggcgaccattgctaaagtccaggtacatatattgatgag  
gaaaaggctgaagttgctcgcttgacagcaatggccacagcgaatgagcttgaggcccta  
cctgggtatgaacggttcgtgcaaccttcgaaaaaaaagtctccatggctctgaaccaggcc  
cgtgataaggctggtaccacaacacagaagagtttgaaggattcaacaacgctgtcacc  
atggcttcctcaggttccaagggttcatctatcaatatttctcaaagtactgcgcttgctc  
ggtcagcaaattgtcgaaggcaagcgtattccttttggtttcaagtatcgcacattacct  
cacttcaccaaggac

>GA\_3.7 no comment

gagatgaaccttcacgtccccagagtgaggaaacgcgcgctgagggttaaagagctttgt  
ctagttcccttgaacattgtctctcctcagaagaacggtcctttgatgggtatcgtccag  
gactctctggctggtgcctacaagctttgccgtcgagatgttttcctcacaaggagcaa  
atcatgaactgtatgctctgggtgccccaaactgggacggtgtcattcctcaaccgctatc  
tataagcctcgtcctcggtaggactggtaagcagcttatcagcatggttatccctaaggag  
gttagcctgttcaacggtagcgattctggcgaaaacgcccctcttaaggacgagggctctt  
ctgatccaagccggccaactgatgtatggtcttttaactaagaagaacattggtgctgct  
gcgggtggtattgtgcatatcagctacaacgaacttggccccgaaggtgcatggtcttc  
ttaaaccggtgtccagcaggttgtcacctactggcttctcaacaatggtcatagcattggt  
attggtgatacaattcccgatgcggcgaccattgctaaagtccaggtacatatattgatgag  
gaaaaggctgaagttgctcgcttgacagcaatggccacagcgaatgagcttgaggcccta  
cctgggtatgaacggttcgtgcaaccttcgaaaaaaaagtctccatggctctgaaccaggcc  
cgtgataaggctggtaccacaacacagaagagtttgaaggattcaacaacgctgtcacc  
atggcttcctcaggttccaagggttcatctatcaatatttctcaaagtactgcgcttgctc  
ggtcagcaaattgtcgaaggcaagcgtattccttttggtttcaagtatcgcacattacct  
cacttcaccaaggac

>GA\_4.1 no comment

gagatgaaccttcacgtccccagagtgaggaaacgcgcgctgagggttaaagagctttgt  
ctagttcccttgaacattgtctctcctcagaagaacggtcctttgatgggtatcgtccag  
gactctctggctggtgcctacaagctttgccgtcgagatgttttcctcacaaggagcaa  
atcatgaactgtatgctctgggtgccccaaactgggacggtgtcattcctcaaccgctatc  
tataagcctcgtcctcggtaggactggtaagcagcttatcagcatggttatccctaaggag  
gttagcctgttcaacggtagcgattctggcgaaaacgcccctcttaaggacgagggctctt  
ctgatccaagccggccaactgatgtatggtcttttaactaagaagaacattggtgctgct  
gcgggtggtattgtgcatatcagctacaacgaacttggccccgaaggtgcatggtcttc  
ttaaaccggtgtccagcaggttgtcacctactggcttctcaacaatggtcatagcattggt  
attggtgatacaattcccgatgcggcgaccattgctaaagtccaggtacatatattgatgag  
gaaaaggctgaagttgctcgcttgacagcaatggccacagcgaatgagcttgaggcccta  
cctgggtatgaacggttcgtgcaaccttcgaaaaaaaagtctccatggctctgaaccaggcc  
cgtgataaggctggtaccacaacacagaagagtttgaaggattcaacaacgctgtcacc  
atggcttcctcaggttccaagggttcatctatcaatatttctcaaagtactgcgcttgctc  
ggtcagcaaattgtcgaaggcaagcgtattccttttggtttcaagtatcgcacattacct  
cacttcaccaaggac

>GA\_4.2 no comment

gagatgaaccttcacgtccccagagtgaggaaacgcgcgctgagggttaaagagctttgt  
ctagttcccttgaacattgtctctcctcagaagaacggtcctttgatgggtatcgtccag  
gactctctggctggtgcctacaagctttgccgtcgagatgttttcctcacaaggagcaa  
atcatgaactgtatgctctgggtgccccaaactgggacggtgtcattcctcaaccgctatc  
tataagcctcgtcctcggtaggactggtaagcagcttatcagcatggttatccctaaggag  
gttagcctgttcaacggtagcgattctggcgaaaacgcccctcttaaggacgagggctctt  
ctgatccaagccggccaactgatgtatggtcttttaactaagaagaacattggtgctgct  
gcgggtggtattgtgcatatcagctacaacgaacttggccccgaaggtgcatggtcttc  
ttaaaccggtgtccagcaggttgtcacctactggcttctcaacaatggtcatagcattggt  
attggtgatacaattcccgatgcggcgaccattgctaaagtccaggtacatatattgatgag  
gaaaaggctgaagttgctcgcttgacagcaatggccacagcgaatgagcttgaggcccta  
cctgggtatgaacggttcgtgcaaccttcgaaaaaaaagtctccatggctctgaaccaggcc  
cgtgataaggctggtaccacaacacagaagagtttgaaggattcaacaacgctgtcacc  
atggcttcctcaggttccaagggttcatctatcaatatttctcaaagtactgcgcttgctc  
ggtcagcaaattgtcgaaggcaagcgtattccttttggtttcaagtatcgcacattacct  
ttaaaccggtgtccagcaggttgtcacctactggcttctcaacaatggtcatagcattggt



attggtgatacaattcccgatgcggcgaccattgctaaagttcaggtacatattgatgag  
gaaaaggctgaagttgctcgcttgacagcaatggccacagcgaatgagcttgaggcccta  
cctgggtatgaacggttcgtgcaaccttcgaaaacaaagtctccatggctctgaaccaggcc  
cgtgataaggctggtaccacaacacagaagagtttgaaggattcaaacaacgctgtcacc  
atggcttcctcaggttccaagggttcattctatcaatatttctcaaagactgcgcttgct  
ggtcagcaaatgtgcgaaggcaagcgtattccttttggtttcaagtatcgacattacct  
cattcaccaaggac

>GA\_4.3 no comment

gagatgaaccttcacgtcccccagagtgaggaaacgcgcgctgaggttaaagagctttgt  
ctagttcccttgaaacattgtctctcctcagaagaacggtcctttgatgggtatcgccag  
gactctctggctggtgcctacaagctttgccgtcgagatgttttcctcacaaggagcaa  
atcatgaactgtatgctctgggtgcccactgggacggtgtcattcctcaaccgctatc  
tataagcctcgtcctcgggtggactggtaagcagcttatcagcatggttatccctaaggag  
gttagcctgttcaacgggtacggattctggcgaaaacgccccctttaaggacgagggctct  
ctgatccaagccggccaactgatgtatgggtcttttaactaagaagaacattgggtgctgct  
gcgggtggtattgtgcataatcagctacaacgaacttggccccgaagggtgcgatggctttc  
ttaaagggtgtccagcaggttgtcacctactggcttctcaacaatgggtcatagcattgggt  
attggtgatacaattcccgatgcggcgaccattgctaaagttcaggtacatattgatgag  
gaaaaggctgaagttgctcgcttgacagcaatggccacagcgaatgagcttgaggcccta  
cctgggtatgaacggttcgtgcaaccttcgaaaacaaagtctccatggctctgaaccaggcc  
cgtgataaggctggtaccacaacacagaagagtttgaaggattcaaacaacgctgtcacc  
atggcttcctcaggttccaagggttcattctatcaatatttctcaaagactgcgcttgct  
ggtcagcaaatgtgcgaaggcaagcgtattccttttggtttcaagtatcgacattacct  
cattcaccaaggac

>GA\_5.3 no comment

gagatgaaccttcacgtcccccagagtgaggaaacgcgcgctgaggttaaagagctttgt  
ctagttcccttgaaacattgtctctcctcagaagaacggtcctttgatgggtatcgccag  
gactctctggctggtgcctacaagctttgccgtcgagatgttttcctcacaaggagcaa  
atcatgaactgtatgctctgggtgcccactgggacggtgtcattcctcaaccgctatc  
tataagcctcgtcctcgggtggactggtaagcagcttatcagcatggttatccctaaggag  
gttagcctgttcaacgggtacggattctggcgaaaacgccccctttaaggacgagggctct  
ctgatccaagccggccaactgatgtatgggtcttttaactaagaagaacattgggtgctgct  
gcgggtggtattgtgcataatcagctacaacgaacttggccccgaagggtgcgatggctttc  
ttaaagggtgtccagcaggttgtcacctactggcttctcaacaatgggtcatagcattgggt  
attggtgatacaattcccgatgcggcgaccattgctaaagttcaggtacatattgatgag  
gaaaaggctgaagttgctcgcttgacagcaatggccacagcgaatgagcttgaggcccta  
cctgggtatgaacggttcgtgcaaccttcgaaaacaaagtctccatggctctgaaccaggcc  
cgtgataaggctggtaccacaacacagaagagtttgaaggattcaaacaacgctgtcacc  
atggcttcctcaggttccaagggttcattctatcaatatttctcaaagactgcgcttgct  
ggtcagcaaatgtgcgaaggcaagcgtattccttttggtttcaagtatcgacattacct  
cattcaccaaggac

>GA\_5.4 no comment

gagatgaaccttcacgtcccccagagtgaggaaacgcgcgctgaggttaaagagctttgt  
ctagttcccttgaaacattgtctctcctcagaagaacggtcctttgatgggtatcgccag  
gactctctggctggtgcctacaagctttgccgtcgagatgttttcctcacaaggagcaa  
atcatgaactgtatgctctgggtgcccactgggacggtgtcattcctcaaccgctatc  
tataagcctcgtcctcgggtggactggtaagcagcttatcagcatggttatccctaaggag  
gttagcctgttcaacgggtacggattctggcgaaaacgccccctttaaggacgagggctct  
ctgatccaagccggccaactgatgtatgggtcttttaactaagaagaacattgggtgctgct  
gcgggtggtattgtgcataatcagctacaacgaacttggccccgaagggtgcgatggctttc  
ttaaagggtgtccagcaggttgtcacctactggcttctcaacaatgggtcatagcattgggt  
attggtgatacaattcccgatgcggcgaccattgctaaagttcaggtacatattgatgag  
gaaaaggctgaagttgctcgcttgacagcaatggccacagcgaatgagcttgaggcccta  
cctgggtatgaacggttcgtgcaaccttcgaaaacaaagtctccatggctctgaaccaggcc  
cgtgataaggctggtaccacaacacagaagagtttgaaggattcaaacaacgctgtcacc  
atggcttcctcaggttccaagggttcattctatcaatatttctcaaagactgcgcttgct  
ggtcagcaaatgtgcgaaggcaagcgtattccttttggtttcaagtatcgacattacct  
cattcaccaaggac

>GA\_92.3 no comment

gagatgaaccttcacgtcccccagagtgaggaaacgcgcgctgaggttaaagagctttgt  
ctagttcccttgaaacattgtctctcctcagaagaacggtcctttgatgggtatcgccag

gactctctggctggtgcctacaagctttgccgtcgagatgttttcctcacaagaggagcaa  
atcatgaactgtatgctctgggtgcccactgggacggtgtcattcctcaaccgctatc  
tataagcctcgtcctcgggtggactggttaagcagcttatcagcatggttatccctaaggag  
gttagcctgttcaacgggtacggattctggcgaaaacgcccctcttaaggacgagggctctt  
ctgatccaagccggccaactgatgtatggtcttttaactaagaagaacattggtgctgct  
gcggtggtgattgtgcatatcagctacaacgaacttggccccgaaggtgcatggtgctttc  
ttaaacggtgtccagcaggttgtcacctactggcttctcaacaatggtcatagcattggt  
attggtgatacaattcccgatgcggcgaccattgctaaagttcaggtacatattgatgag  
gaaaaggctgaagttgctcgcttgacagcaatggccacagcgaatgagcttgaggcccta  
cctggtatgaacggttcgtgcaaccttcgaaaacaaagtctccatggctctgaaccaggcc  
cgtgataaggctggttaccacaacacagaagagtttgaaggattcaacaacgctgtcacc  
atggcttccctcaggttccaagggttcattcatcaatatttctcaaagtactgcgcttgct  
ggtcagcaaatgtcgaaggcaagcgtattccttttggtttcaagtatcgcacattacct  
cacttcaccaaggac

>GA\_99.2 no comment

gagatgaaccttcacgtccccagagtgaggaaacgcgcgctgaggttaaagagctttgt  
ctagttcccttgaacattgtctctcctcagaagaacggtcctttgatgggtatcgccag  
gactctctggctggtgcctacaagctttgccgtcgagatgttttcctcacaagaggagcaa  
atcatgaactgtatgctctgggtgcccactgggacggtgtcattcctcaaccgctatc  
tataagcctcgtcctcgggtggactggttaagcagcttatcagcatggttatccctaaggag  
gttagcctgttcaacgggtacggattctggcgaaaacgcccctcttaaggacgagggctctt  
ctgatccaagccggccaactgatgtatggtcttttaactaagaagaacattggtgctgct  
gcggtggtgattgtgcatatcagctacaacgaacttggccccgaaggtgcatggtgctttc  
ttaaacggtgtccagcaggttgtcacctactggcttctcaacaatggtcatagcattggt  
attggtgatacaattcccgatgcggcgaccattgctaaagttcaggtacatattgatgag  
gaaaaggctgaagttgctcgcttgacagcaatggccacagcgaatgagcttgaggcccta  
cctggtatgaacggttcgtgcaaccttcgaaaacaaagtctccatggctctgaaccaggcc  
cgtgataaggctggttaccacaacacagaagagtttgaaggattcaacaacgctgtcacc  
atggcttccctcaggttccaagggttcattcatcaatatttctcaaagtactgcgcttgct  
ggtcagcaaatgtcgaaggcaagcgtattccttttggtttcaagtatcgcacattacct  
cacttcaccaaggac

>NL\_FOA01 no comment

gagatgaaccttcacgtccccagagcgaggaaacgcgcgctgaggttaaagagctttgt  
ctagttcccttgaacattgtctctcctcagaagaacggtcctttgatgggtatcgccag  
gactctctggctggtgcctacaagctttgccgtcgagatgttttcctcacaagaggagcaa  
atcatgaactgtatgctctgggtgcccactgggacggtgtcattcctcaaccgctatc  
tataagcctcgtcctcgggtggactggttaagcagcttatcagcatggttatccctaaggag  
gttagcctgttcaacgggtacggattctggtgaaaacgcccctcttaaggacgagggctctt  
ctgatccaagccggccaactgatgtatggtcttttaactaagaagaacattggtgctgct  
gcggtggtgattgtgcatatcagctacaacgaacttggccccgaaggtgcatggtgctttc  
ttaaacggtgtccagcaggttgtcacctactggcttctcaacaatggtcatagcattggt  
attggtgatacaattcccgatgcggcgaccattgctaaagttcaggtacatattgatgag  
gaaaaggctgaagttgctcgcttgacagcaatggccacagcgaatgagcttgaggcccta  
cctggtatgaacggttcgtgcaaccttcgaaaacaaagtctccatggctctgaaccaggcc  
cgtgataaggctggttaccacaacacagaagagtttgaaggattcaacaacgctgtcacc  
atggcttccctcaggttccaagggttcattcatcaatatttctcaaagtactgcgcttgct  
ggtcagcaaatgtcgaaggcaagcgtattccttttggtttcaagtatcgcacattacct  
cacttcaccaaggac

>NL\_FOA02 no comment

gagatgaaccttcacgtccccagagcgaggaaacgcgcgctgaggttaaagagctttgt  
ctagttcccttgaacattgtctctcctcagaagaacggtcctttgatgggtatcgccag  
gactctctggctggtgcctacaagctttgccgtcgagatgttttcctcacaagaggagcaa  
atcatgaactgtatgctctgggtgcccactgggacggtgtcattcctcaaccgctatc  
tataagcctcgtcctcgggtggactggttaagcagcttatcagcatggttatccctaaggag  
gttagcctgttcaacgggtacggattctggtgaaaacgcccctcttaaggacgagggctctt  
ctgatccaagccggccaactgatgtatggtcttttaactaagaagaacattggtgctgct  
gcggtggtgattgtgcatatcagctacaacgaacttggccccgaaggtgcatggtgctttc  
ttaaacggtgtccagcaggttgtcacctactggcttctcaacaatggtcatagcattggt  
attggtgatacaattcccgatgcggcgaccattgctaaagttcaggtacatattgatgag  
gaaaaggctgaagttgctcgcttgacagcaatggccacagcgaatgagcttgaggcccta  
cctggtatgaacggttcgtgcaaccttcgaaaacaaagtctccatggctctgaaccaggcc

cgtgataaggctggtaccacaacacagaagagtttgaaggattcaaacaacgctgtcacc  
atggcttcctcaggttccaagggttcattctatcaatatttctcaaagactgacgcttgct  
ggtcagcaaattgtcgaaggcaagcgtattccttttggtttcaagtatcgacattacct  
cacttcaccaaggac

>NL\_FOA03 no comment

gagatgaaccttcacgtccccagagtgaaggaaacgcgcgctgaggttaaagagctttgt  
ctagttcccttgaacattgtctctcctcagaagaacggtcctttgatgggtatcgccag  
gactctctggctggtgcctacaagctttgccgtcgagatgttttctcacaaggagcaa  
atcatgaactgtatgctctgggtgcccaactgggacggtgtcattcctcaaccgctatc  
tataagcctcgtcctcgggtggactggttaagcagcttatcagcatggttatccctaaggag  
gttagcctgttcaacgggtacggattctggcgaaaacgcccctcttaaggacgagggtctt  
ctgatccaagccggccaactgatgtatggtcttttaactaagaagaacattgggtgctgct  
gcggggtggtattgtgcatatcagctacaacgaacttggccccgaagggtgcgatggctttc  
ttaaacggtgtccagcaggttgtcacctactggcttctcaacaatggtcatagcattgggt  
attgggtgatacaattcccgatgcggcgaccattgctaaagttcaggtacatattgatgag  
gaaaaggctgaagttgctcgcttgacagcaatggccacagcgaatgagcttgaggcccta  
cctgggtatgaacggttcgtgcaaccttcgaaaaaaaagtctccatgggtctgaaccaggcc  
cgtgataaggctggtaccacaacacagaagagtttgaaggattcaaacaacgctgtcacc  
atggcttcctcaggttccaagggttcattctatcaatatttctcaaagactgacgcttgct  
ggtcagcaaattgtcgaaggcaagcgtattccttttggtttcaagtatcgacattacct  
cacttcaccaaggac

>NL\_FOA04 no comment

gagatgaaccttcacgtccccagagtgaaggaaacgcgcgctgaggttaaagagctttgt  
ctagttcccttgaacattgtctctcctcagaagaacggtcctttgatgggtatcgccag  
gactctctggctggtgcctacaagctttgccgtcgagatgttttctcacaaggagcaa  
atcatgaactgtatgctctgggtgcccaactgggacggtgtcattcctcaaccgctatc  
tataagcctcgtcctcgggtggactggttaagcagcttatcagcatggttatccctaaggag  
gttagcctgttcaacgggtacggattctggcgaaaacgcccctcttaaggacgagggtctt  
ctgatccaagccggccaactgatgtatggtcttttaactaagaagaacattgggtgctgct  
gcggggtggtattgtgcatatcagctacaacgaacttggccccgaagggtgcgatggctttc  
ttaaacggtgtccagcaggttgtcacctactggcttctcaacaatggtcatagcattgggt  
attgggtgatacaattcccgatgcggcgaccattgctaaagttcaggtacatattgatgag  
gaaaaggctgaagttgctcgcttgacagcaatggccacagcgaatgagcttgaggcccta  
cctgggtatgaacggttcgtgcaaccttcgaaaaaaaagtctccatgggtctgaaccaggcc  
cgtgataaggctggtaccacaacacagaagagtttgaaggattcaaacaacgctgtcacc  
atggcttcctcaggttccaagggttcattctatcaatatttctcaaagactgacgcttgct  
ggtcagcaaattgtcgaaggcaagcgtattccttttggtttcaagtatcgacattacct  
cacttcaccaaggac

>NL\_FOA05 no comment

gagatgaaccttcacgtccccagagtgaaggaaacgcgcgctgaggttaaagagctttgt  
ctagttcccttgaacattgtctctcctcagaagaacggtcctttgatgggtatcgccag  
gactctctggctggtgcctacaagctttgccgtcgagatgttttctcacaaggagcaa  
atcatgaactgtatgctctgggtgcccaactgggacggtgtcattcctcaaccgctatc  
tataagcctcgtcctcgggtggactggttaagcagcttatcagcatggttatccctaaggag  
gttagcctgttcaacgggtacggattctggcgaaaacgcccctcttaaggacgagggtctt  
ctgatccaagccggccaactgatgtatggtcttttaactaagaagaacattgggtgctgct  
gcggggtggtattgtgcatatcagctacaacgaacttggccccgaagggtgcgatggctttc  
ttaaacggtgtccagcaggttgtcacctactggcttctcaacaatggtcatagcattgggt  
attgggtgatacaattcccgatgcggcgaccattgctaaagttcaggtacatattgatgag  
gaaaaggctgaagttgctcgcttgacagcaatggccacagcgaatgagcttgaggcccta  
cctgggtatgaacggttcgtgcaaccttcgaaaaaaaagtctccatgggtctgaaccaggcc  
cgtgataaggctggtaccacaacacagaagagtttgaaggattcaaacaacgctgtcacc  
atggcttcctcaggttccaagggttcattctatcaatatttctcaaagactgacgcttgct  
ggtcagcaaattgtcgaaggcaagcgtattccttttggtttcaagtatcgacattacct  
cacttcaccaaggac

>SP\_FOA01 no comment

gagatgaaccttcacgtccccagagtgaaggaaacgcgcgctgaggttaaagagctttgt  
ctagttcccttgaacattgtctctcctcagaagaacggtcctttgatgggtatcgccag  
gactctctggctggtgcctacaagctttgccgtcgagatgttttctcacaaggagcaa  
atcatgaactgtatgctctgggtgcccaactgggacggtgtcattcctcaaccgctatc  
tataagcctcgtcctcgggtggactggttaagcagcttatcagcatggttatccctaaggag

gtagcctgttcaacggtacggattctggcgaaaacgccccctttaaggacgagggctctt  
ctgatccaagccggccaactgatgtatggtcttttaactaagaagaacattggtgctgct  
gcggggtggtattgtgcatatcagctacaacgaacttggccccgaagggtgcgatggctttc  
ttaaacggtgtccagcaggttgtcacctactggcttctcaacaatggtcatagcattggt  
attggtgatacaattcccgatgcggcgaccattgctaaagttcaggtacatattgatgag  
gaaaaggctgaagttgctcgcttgacagcaatggccacagcgaatgagcttgaggcccta  
cctggtatgaacggttcgtgcaaccttcgaaaacaaagtctccatggctctgaaccaggcc  
cgtgataaggctggtaccacaacacagaagagtttgaaggattcaaacaacgctgtcacc  
atggcttcctcaggttccaagggttcatctatcaatatttctcaaatgactgcgcttgct  
ggtcagcaaattgtcgaaggcaagcgtattccttttggtttcaagtatcgacattacct  
cacttcaccaaggac

>SP\_FOA02 no comment

gagatgaaccttcacgtccccagagtgaggaaaacgcgcgctgagggttaaagagctttgt  
ctagttcccttgaacattgtctctcctcagaagaacgggtcctttgatgggtatcgtccag  
gactctctggctggtgcctacaagctttgccgtcgagatgttttctcacaaggagcaa  
atcatgaactgtatgctctgggtgcccaactgggacgggtgtcattcctcaaccgcctatc  
tataagcctcgtcctcggtggactggtaagcagcttatcagcatgggttatccctaaggag  
gtagcctgttcaacggtacggattctggcgaaaacgccccctttaaggacgagggctctt  
ctgatccaagccggccaactgatgtatggtcttttaactaagaagaacattggtgctgct  
gcggggtggtattgtgcatatcagctacaacgaacttggccccgaagggtgcgatggctttc  
ttaaacggtgtccagcaggttgtcacctactggcttctcaacaatggtcatagcattggt  
attggtgatacaattcccgatgcggcgaccattgctaaagttcaggtacatattgatgag  
gaaaaggctgaagttgctcgcttgacagcaatggccacagcgaatgagcttgaggcccta  
cctggtatgaacggttcgtgcaaccttcgaaaacaaagtctccatggctctgaaccaggcc  
cgtgataaggctggtaccacaacacagaagagtttgaaggattcaaacaacgctgtcacc  
atggcttcctcaggttccaagggttcatctatcaatatttctcaaatgactgcgcttgct  
ggtcagcaaattgtcgaaggcaagcgtattccttttggtttcaagtatcgacattacct  
cacttcaccaaggac

>SP\_FOA03 no comment

gagatgaaccttcacgtccccagagtgaggaaaacgcgcgctgagggttaaagagctttgt  
ctagttcccttgaacattgtctctcctcagaagaacgggtcctttgatgggtatcgtccag  
gactctctggctggtgcctacaagctttgccgtcgagatgttttctcacaaggagcaa  
atcatgaactgtatgctctgggtgcccaactgggacgggtgtcattcctcaaccgcctatc  
tataagcctcgtcctcggtggactggtaagcagcttatcagcatgggttatccctaaggag  
gtagcctgttcaacggtacggattctggcgaaaacgccccctttaaggacgagggctctt  
ctgatccaagccggccaactgatgtatggtcttttaactaagaagaacattggtgctgct  
gcggggtggtattgtgcatatcagctacaacgaacttggccccgaagggtgcgatggctttc  
ttaaacggtgtccagcaggttgtcacctactggcttctcaacaatggtcatagcattggt  
attggtgatacaattcccgatgcggcgaccattgctaaagttcaggtacatattgatgag  
gaaaaggctgaagttgctcgcttgacagcaatggccacagcgaatgagcttgaggcccta  
cctggtatgaacggttcgtgcaaccttcgaaaacaaagtctccatggctctgaaccaggcc  
cgtgataaggctggtaccacaacacagaagagtttgaaggattcaaacaacgctgtcacc  
atggcttcctcaggttccaagggttcatctatcaatatttctcaaatgactgcgcttgct  
ggtcagcaaattgtcgaaggcaagcgtattccttttggtttcaagtatcgacattacct  
cacttcaccaaggac

>SP\_FOA04 no comment

gagatgaaccttcacgtccccagagtgaggaaaacgcgcgctgagggttaaagagctttgt  
ctagttcccttgaacattgtctctcctcagaagaacgggtcctttgatgggtatcgtccag  
gactctctggctggtgcctacaagctttgccgtcgagatgttttctcacaaggagcaa  
atcatgaactgtatgctctgggtgcccaactgggacgggtgtcattcctcaaccgcctatc  
tataagcctcgtcctcggtggactggtaagcagcttatcagcatgggttatccctaaggag  
gtagcctgttcaacggtacggattctggcgaaaacgccccctttaaggacgagggctctt  
ctgatccaagccggccaactgatgtatggtcttttaactaagaagaacattggtgctgct  
gcggggtggtattgtgcatatcagctacaacgaacttggccccgaagggtgcgatggctttc  
ttaaacggtgtccagcaggttgtcacctactggcttctcaacaatggtcatagcattggt  
attggtgatacaattcccgatgcggcgaccattgctaaagttcaggtacatattgatgag  
gaaaaggctgaagttgctcgcttgacagcaatggccacagcgaatgagcttgaggcccta  
cctggtatgaacggttcgtgcaaccttcgaaaacaaagtctccatggctctgaaccaggcc  
cgtgataaggctggtaccacaacacagaagagtttgaaggattcaaacaacgctgtcacc  
atggcttcctcaggttccaagggttcatctatcaatatttctcaaatgactgcgcttgct  
ggtcagcaaattgtcgaaggcaagcgtattccttttggtttcaagtatcgacattacct

cacttcaccaaggac

>SP\_FOA05 no comment

gagatgaaccttcacgtccccagagtgaggaacgcgcgctgagggttaaagagctttgt  
ctagttcccttgaacattgtctctcctcagaagaacggtcctttgatgggtatcgccag  
gactctctggctggtgcctacaagctttgccgtcgagatgttttcctcacaaggagcaa  
atcatgaactgtatgctctgggtgccccaaactgggacgggtgtcattcctcaaccgctatc  
tataagcctcgtcctcgggtggactggtaagcagcttatcagcatggttatccctaaggag  
gttagcctgttcaacgggtacggattctggcgaaaacgcccctcttaaggacgagggctctt  
ctgatccaagccggccaactgatgtatggtcttttaactaagaagaacattgggtgctgct  
gcgggtggtattgtgcataatcagctacaacgaacttggccccgaagggtgcgatggctttc  
ttaaacgggtgtccagcaggttgtcacctactggcttctcaacaatgggtcatagcattggt  
attggtgatacaattcccgatgcggcgaccattgctaaagtccaggtacatattgatgag  
gaaaaggctgaagttgctcgcttgacagcaatggccacagcgaatgagcttgaggcccta  
cctgggtatgaacgttcgtgcaaccttcgaaaaaaaagtctccatggctctgaaccaggcc  
cgtgataaggctggtaccacaacacagaagagtttgaaggattcaaacaacgctgtcacc  
atggcttcctcaggttccaagggttcatctatcaatatttctcaaagtactgcgcttgctc  
ggtcagcaaattgtcgaaggcaagcgtattccttttggtttcaagtatcgcacattacct  
cacttcaccaaggac

>SP\_FOA06 no comment

gagatgaaccttcacgtccccagagcgaggaacgcgcgctgagggttaaagagctttgt  
ctagttcccttgaacattgtctctcctcagaagaacggtcctttgatgggtatcgccag  
gactctctggctggtgcctacaagctttgccgtcgagatgttttcctcacaaggagcaa  
atcatgaactgtatgctctgggtgccccaaactgggacgggtgtcattcctcaaccgctatc  
tataagcctcgtcctcgggtggactggtaagcagcttatcagcatggttatccctaaggag  
gttagcctgttcaacgggtacggattctgggtgaaaacgcccctcttaaggacgagggctctt  
ctgatccaagccggccaactgatgtatggtcttttaactaagaagaacattgggtgctgct  
gcgggtggtattgtgcataatcagctacaacgaacttggccccgaagggtgcgatggctttc  
ttaaacgggtgtccagcaggttgtcacctactggcttctcaacaatgggtcatagcattggt  
attggtgatacaattcccgatgcggcgaccattgctaaagtccaggtacatattgatgag  
gaaaaggctgaagttgctcgcttgacagcaatggccacagcgaatgagcttgaggcccta  
cctgggtatgaacgttcgtgcaaccttcgaaaaaaaagtctccatggctctgaaccaggcc  
cgtgataaggctggtaccacaacacagaagagtttgaaggattcaaacaacgctgtcacc  
atggcttcctcaggttccaagggttcatctatcaatatttctcaaagtactgcgcttgctc  
ggtcagcaaattgtcgaaggcaagcgtattccttttggtttcaagtatcgcacattacct  
cacttcaccaaggac

>SP\_FOA07 no comment

gagatgaaccttcacgtccccagagtgaggaacgcgcgctgagggttaaagagctttgt  
ctagttcccttgaacattgtctctcctcagaagaacggtcctttgatgggtatcgccag  
gactctctggctggtgcctacaagctttgccgtcgagatgttttcctcacaaggagcaa  
atcatgaactgtatgctctgggtgccccaaactgggacgggtgtcattcctcaaccgctatc  
tataagcctcgtcctcgggtggactggtaagcagcttatcagcatggttatccctaaggag  
gttagcctgttcaacgggtacggattctggcgaaaacgcccctcttaaggacgagggctctt  
ctgatccaagccggccaactgatgtatggtcttttaactaagaagaacattgggtgctgct  
gcgggtggtattgtgcataatcagctacaacgaacttggccccgaagggtgcgatggctttc  
ttaaacgggtgtccagcaggttgtcacctactggcttctcaacaatgggtcatagcattggt  
attggtgatacaattcccgatgcggcgaccattgctaaagtccaggtacatattgatgag  
gaaaaggctgaagttgctcgcttgacagcaatggccacagcgaatgagcttgaggcccta  
cctgggtatgaacgttcgtgcaaccttcgaaaaaaaagtctccatggctctgaaccaggcc  
cgtgataaggctggtaccacaacacagaagagtttgaaggattcaaacaacgctgtcacc  
atggcttcctcaggttccaagggttcatctatcaatatttctcaaagtactgcgcttgctc  
ggtcagcaaattgtcgaaggcaagcgtattccttttggtttcaagtatcgcacattacct  
cacttcaccaaggac

>SP\_FOA08 no comment

gagatgaaccttcacgtccccagagcgaggaacgcgcgctgagggttaaagagctttgt  
ctagttcccttgaacattgtctctcctcagaagaacggtcctttgatgggtatcgccag  
gactctctggctggtgcctacaagctttgccgtcgagatgttttcctcacaaggagcaa  
atcatgaactgtatgctctgggtgccccaaactgggacgggtgtcattcctcaaccgctatc  
tataagcctcgtcctcgggtggactggtaagcagcttatcagcatggttatccctaaggag  
gttagcctgttcaacgggtacggattctgggtgaaaacgcccctcttaaggacgagggctctt  
ctgatccaagccggccaactgatgtatggtcttttaactaagaagaacattgggtgctgct  
gcgggtggtattgtgcataatcagctacaacgaacttggccccgaagggtgcgatggctttc  
ttaaacgggtgtccagcaggttgtcacctactggcttctcaacaatgggtcatagcattggt  
attggtgatacaattcccgatgcggcgaccattgctaaagtccaggtacatattgatgag  
gaaaaggctgaagttgctcgcttgacagcaatggccacagcgaatgagcttgaggcccta  
cctgggtatgaacgttcgtgcaaccttcgaaaaaaaagtctccatggctctgaaccaggcc  
cgtgataaggctggtaccacaacacagaagagtttgaaggattcaaacaacgctgtcacc  
atggcttcctcaggttccaagggttcatctatcaatatttctcaaagtactgcgcttgctc  
ggtcagcaaattgtcgaaggcaagcgtattccttttggtttcaagtatcgcacattacct  
cacttcaccaaggac

ttaaacggtgtccagcaggttgtcacctactggcttctcaacaatgggtcatagcattggt  
attggtgatacaattcccgatgcggcgaccattgctaaagttcaggtacatattgatgag  
gaaaaggctgaagttgctcgcttgacagcaatggccacagcgaatgagcttgaggcccta  
cctgggtatgaacggttcgtgcaaccttcgaaaacaaagtctccatggctctgaaccaggcc  
cgtgataaggctggtaccacaacacagaagagtttgaaggattcaaacaacgctgtcacc  
atggcttcctcaggttccaagggttcatctatcaatatttctcaaagactgcgcttgctc  
ggtcagcaaattgtcgaaggcaagcgtattccttttggtttcaagtatcgacattacct  
cactttaccaaggac

>SP\_FOA09 no comment

gagatgaaccttcacgtcccccagagcgaggaaacgcgcgctgaggttaaagagctttgt  
ctagttcccttgaacattgtctctcctcagaagaacggtcctttgatgggtatcgccag  
gactctctggctgggtgcctacaagctttgccgtcgagatgttttcctcacaaggagcaa  
atcatgaactgtatgctctgggtgcccactgggacggtgtcattcctcaaccgctatc  
tataagcctcgctcctcggtggactggtaagcagcttatcagcatggttatccctaaggag  
gttagcctgttcaacggtacggattctggtgaaaacgccccctttaaggacgagggctctt  
ctgatccaagccggccaactgatgtatggtcttttaactaagaagaacattgggtgctgct  
gcgggtggtattgtgcataatcagctacaacgaacttggccccgaagggtgcgatggctttc  
ttaaacggtgtccagcaggttgtcacctactggcttctcaacaatgggtcatagcattggt  
attggtgatacaattcccgatgcggcgaccattgctaaagttcaggtacatattgatgag  
gaaaaggctgaagttgctcgcttgacagcaatggccacagcgaatgagcttgaggcccta  
cctgggtatgaacggttcgtgcaaccttcgaaaacaaagtctccatggctctgaaccaggcc  
cgtgataaggctggtaccacaacacagaagagtttgaaggattcaaacaacgctgtcacc  
atggcttcctcaggttccaagggttcatctatcaatatttctcaaagactgcgcttgctc  
ggtcagcaaattgtcgaaggcaagcgtattccttttggtttcaagtatcgacattacct  
cactttaccaaggac

>SP\_FOA10 no comment

gagatgaaccttcacgtcccccagagtgaggaaacgcgcgctgaggttaaagagctttgt  
ctagttcccttgaacattgtctctcctcagaagaacggtcctttgatgggtatcgccag  
gactctctggctgggtgcctacaagctttgccgtcgagatgttttcctcacaaggagcaa  
atcatgaactgtatgctctgggtgcccactgggacggtgtcattcctcaaccgctatc  
tataagcctcgctcctcggtggactggtaagcagcttatcagcatggttatccctaaggag  
gttagcctgttcaacggtacggattctggtgaaaacgccccctttaaggacgagggctctt  
ctgatccaagccggccaactgatgtatggtcttttaactaagaagaacattgggtgctgct  
gcgggtggtattgtgcataatcagctacaacgaacttggccccgaagggtgcgatggctttc  
ttaaacggtgtccagcaggttgtcacctactggcttctcaacaatgggtcatagcattggt  
attggtgatacaattcccgatgcggcgaccattgctaaagttcaggtacatattgatgag  
gaaaaggctgaagttgctcgcttgacagcaatggccacagcgaatgagcttgaggcccta  
cctgggtatgaacggttcgtgcaaccttcgaaaacaaagtctccatggctctgaaccaggcc  
cgtgataaggctggtaccacaacacagaagagtttgaaggattcaaacaacgctgtcacc  
atggcttcctcaggttccaagggttcatctatcaatatttctcaaagactgcgcttgctc  
ggtcagcaaattgtcgaaggcaagcgtattccttttggtttcaagtatcgacattacct  
cacttcaccaaggac

>SP\_FOA11 no comment

gagatgaaccttcacgtcccccagagcgaggaaacgcgcgctgaggttaaagagctttgt  
ctagttcccttgaacattgtctctcctcagaagaacggtcctttgatgggtatcgccag  
gactctctggctgggtgcctacaagctttgccgtcgagatgttttcctcacaaggagcaa  
atcatgaactgtatgctctgggtgcccactgggacggtgtcattcctcaaccgctatc  
tataagcctcgctcctcggtggactggtaagcagcttatcagcatggttatccctaaggag  
gttagcctgttcaacggtacggattctggtgaaaacgccccctttaaggacgagggctctt  
ctgatccaagccggccaactgatgtatggtcttttaactaagaagaacattgggtgctgct  
gcgggtggtattgtgcataatcagctacaacgaacttggccccgaagggtgcgatggctttc  
ttaaacggtgtccagcaggttgtcacctactggcttctcaacaatgggtcatagcattggt  
attggtgatacaattcccgatgcggcgaccattgctaaagttcaggtacatattgatgag  
gaaaaggctgaagttgctcgcttgacagcaatggccacagcgaatgagcttgaggcccta  
cctgggtatgaacggttcgtgcaaccttcgaaaacaaagtctccatggctctgaaccaggcc  
cgtgataaggctggtaccacaacacagaagagtttgaaggattcaaacaacgctgtcacc  
atggcttcctcaggttccaagggttcatctatcaatatttctcaaagactgcgcttgctc  
ggtcagcaaattgtcgaaggcaagcgtattccttttggtttcaagtatcgacattacct  
cacttcaccaaggac

>SP\_FOA12 no comment

gagatgaaccttcacgtcccccagagcgaggaaacgcgcgctgaggttaaagagctttgt

ctagttcccttgaacattgtctctcctcagaagaacggtcctttgatgggtatcgccag  
gactctctggctggtgcctacaagctttgccgtcgagatgttttcctcacaaggagcaa  
atcatgaactgtatgctctgggtgccaactgggacgggtgtcattcctcaaccgcctatc  
tataagcctcgtcctcgggtggactggtaagcagcttatcagcatggttatccctaaggag  
gttagcctgttcaacgggtacggattctgggtgaaaacgcccctcttaaggacgagggctct  
ctgatccaagccggccaactgatgtatggctcttttaactaagaagaacattgggtgctgct  
gcggtggttattgtgcatatcagctacaacgaacttggccccgaaggtgcatggctttc  
ttaaacggtgtccagcaggttgtcacctactggcttctcaacaatgggtcatagcattgggt  
attgggtgatacaattcccgatgcggcgaccattgctaaagttcaggtacatattgatgag  
gaaaaggctgaagttgctcgcttgacagcaatggccacagcgaatgagcttgaggcccta  
cctgggtatgaacggttcgtgcaaccttcgaaaacaaagtctccatggctctgaaccaggcc  
cgtgataaggctggtaccacaacacagaagagtttgaaggattcaaacaacgctgtcacc  
atggcttcctcaggttccaagggttcatctatcaatatttctcaaagtactgcgcttgtc  
ggtcagcaaatgtcgaaggcaagcgtattccttttggtttcaagtatcgcacattacct  
cacttcaccaaggac

>SP\_FOA13 no comment

gagatgaaccttcacgtccccagagtgaggaaaacgcgcgctgaggttaaagagctttgt  
ctagttcccttgaacattgtctctcctcagaagaacggtcctttgatgggtatcgccag  
gactctctggctggtgcctacaagctttgccgtcgagatgttttcctcacaaggagcaa  
atcatgaactgtatgctctgggtgccaactgggacgggtgtcattcctcaaccgcctatc  
tataagcctcgtcctcgggtggactggtaagcagcttatcagcatggttatccctaaggag  
gttagcctgttcaacgggtacggattctggcgaaaacgcccctcttaaggacgagggctct  
ctgatccaagccggccaactgatgtatggctcttttaactaagaagaacattgggtgctgct  
gcggtggttattgtgcatatcagctacaacgaacttggccccgaaggtgcatggctttc  
ttaaacggtgtccagcaggttgtcacctactggcttctcaacaatgggtcatagcattgggt  
attgggtgatacaattcccgatgcggcgaccattgctaaagttcaggtacatattgatgag  
gaaaaggctgaagttgctcgcttgacagcaatggccacagcgaatgagcttgaggcccta  
cctgggtatgaacggttcgtgcaaccttcgaaaacaaagtctccatggctctgaaccaggcc  
cgtgataaggctggtaccacaacacagaagagtttgaaggattcaaacaacgctgtcacc  
atggcttcctcaggttccaagggttcatctatcaatatttctcaaagtactgcgcttgtc  
ggtcagcaaatgtcgaaggcaagcgtattccttttggtttcaagtatcgcacattacct  
cacttcaccaaggac

>SP\_FOA14 no comment

gagatgaaccttcacgtccccagagtgaggaaaacgcgcgctgaggttaaagagctttgt  
ctagttcccttgaacattgtctctcctcagaagaacggtcctttgatgggtatcgccag  
gactctctggctggtgcctacaagctttgccgtcgagatgttttcctcacaaggagcaa  
atcatgaactgtatgctctgggtgccaactgggacgggtgtcattcctcaaccgcctatc  
tataagcctcgtcctcgggtggactggtaagcagcttatcagcatggttatccctaaggag  
gttagcctgttcaacgggtacggattctggcgaaaacgcccctcttaaggacgagggctct  
ctgatccaagccggccaactgatgtatggctcttttaactaagaagaacattgggtgctgct  
gcggtggttattgtgcatatcagctacaacgaacttggccccgaaggtgcatggctttc  
ttaaacggtgtccagcaggttgtcacctactggcttctcaacaatgggtcatagcattgggt  
attgggtgatacaattcccgatgcggcgaccattgctaaagttcaggtacatattgatgag  
gaaaaggctgaagttgctcgcttgacagcaatggccacagcgaatgagcttgaggcccta  
cctgggtatgaacggttcgtgcaaccttcgaaaacaaagtctccatggctctgaaccaggcc  
cgtgataaggctggtaccacaacacagaagagtttgaaggattcaaacaacgctgtcacc  
atggcttcctcaggttccaagggttcatctatcaatatttctcaaagtactgcgcttgtc  
ggtcagcaaatgtcgaaggcaagcgtattccttttggtttcaagtatcgcacattacct  
cacttcaccaaggac

>SP\_FOA15 no comment

gagatgaaccttcacgtccctcagagtgaggaaaacgcgcgctgaggttaaagagctttgt  
ctagttcccttgaacattgtctctcctcagaagaacggtcctttgatgggtatcgccag  
gactctctggctggtgcctacaagctttgccgtcgagatgttttcctcacaaggagcaa  
atcatgaactgtatgctctgggtgccaactgggacgggtgtcattcctcaaccgcctatc  
tataagcctcgtcctcgggtggactggtaagcagcttatcagcatggttatccctaaggag  
gttagcctgttcaacgggtacggattctggcgaaaacgcccctcttaaggacgagggctct  
ctgatccaagccggccaactgatgtatggctcttttaactaagaagaacattgggtgctgct  
gcggtggttattgtgcatatcagctacaacgaacttggccccgaaggtgcatggctttc  
ttaaacggtgtccagcaggttgtcacctactggcttctcaacaatgggtcatagcattgggt  
attgggtgatacaattcccgatgcggcgaccattgctaaagttcaggtacatattgatgag  
gaaaaggctgaagttgctcgcttgacagcaatggccacagcgaatgagcttgaggcccta

cctgggtatgaacggttcgtgcaaccttcgaaaacaaagtctccatggctctgaaccaggcc  
cgtgataaggctggtaccacaacacagaagagtttgaaggattcaaacaacgctgtcacc  
atggcttcctcaggttccaagggttcattctatcaatatttctcaaagtactgcgcttgct  
ggtcagcaaatgttggaaggcaagcgatttccttttggtttcaagtatcgacattacct  
catttcaccaaggac

>SP\_FOA16 no comment

gagatgaaccttcacgtccctcagagtgaggaaacgcgcgctgaggttaaagagctttgt  
ctagttcccttgaaacattgtctctcctcagaagaacggtcctttgatgggtatcgccag  
gactctctggctggtgcctacaagctttgccgtcgagatgttttcctcacaaggagcaa  
atcatgaactgtatgctctgggtgccaactgggacgggtgtcattcctcaaccgctatc  
tataagcctcgtcctcggtggactggttaagcagcttatcagcatggttatccctaaggag  
gttagcctgttcaacgggtacggattctggcgaaaacgcccctcttaaggacgagggctct  
ctgatccaagccggccaactgatgtatggtcttttaactaagaagaacattgggtgctgct  
gcggggtggtattgtgcatatcagctacaacgaacttggccccgaagggtgcgatggctttc  
ttaaacggtgtccagcaggttgtcacctactggcttctcaacaatggtcatagcattgggt  
attgggtgatacaattcccgatgcggcgaccattgctaaagttcaggtacatattgatgag  
gaaaaggctgaagttgctcgcttgacagcaatggccacagcgaatgagcttgaggcccta  
cctgggtatgaacggttcgtgcaaccttcgaaaacaaagtctccatggctctgaaccaggcc  
cgtgataaggctggtaccacaacacagaagagtttgaaggattcaaacaacgctgtcacc  
atggcttcctcaggttccaagggttcattctatcaatatttctcaaagtactgcgcttgct  
ggtcagcaaatgttggaaggcaagcgatttccttttggtttcaagtatcgacattacct  
catttcaccaaggac

>SP\_FOA17 no comment

gagatgaaccttcacgtccctcagagtgaggaaacgcgcgctgaggttaaagagctttgt  
ctagttcccttgaaacattgtctctcctcagaagaacggtcctttgatgggtatcgccag  
gactctctggctggtgcctacaagctttgccgtcgagatgttttcctcacaaggagcaa  
atcatgaactgtatgctctgggtgccaactgggacgggtgtcattcctcaaccgctatc  
tataagcctcgtcctcggtggactggttaagcagcttatcagcatggttatccctaaggag  
gttagcctgttcaacgggtacggattctggcgaaaacgcccctcttaaggacgagggctct  
ctgatccaagccggccaactgatgtatggtcttttaactaagaagaacattgggtgctgct  
gcggggtggtattgtgcatatcagctacaacgaacttggccccgaagggtgcgatggctttc  
ttaaacggtgtccagcaggttgtcacctactggcttctcaacaatggtcatagcattgggt  
attgggtgatacaattcccgatgcggcgaccattgctaaagttcaggtacatattgatgag  
gaaaaggctgaagttgctcgcttgacagcaatggccacagcgaatgagcttgaggcccta  
cctgggtatgaacggttcgtgcaaccttcgaaaacaaagtctccatggctctgaaccaggcc  
cgtgataaggctggtaccacaacacagaagagtttgaaggattcaaacaacgctgtcacc  
atggcttcctcaggttccaagggttcattctatcaatatttctcaaagtactgcgcttgct  
ggtcagcaaatgttggaaggcaagcgatttccttttggtttcaagtatcgacattacct  
catttcaccaaggac

>SP\_FOA18 no comment

gagatgaaccttcacgtccctcagagtgaggaaacgcgcgctgaggttaaagagctttgt  
ctagttcccttgaaacattgtctctcctcagaagaacggtcctttgatgggtatcgccag  
gactctctggctggtgcctacaagctttgccgtcgagatgttttcctcacaaggagcaa  
atcatgaactgtatgctctgggtgccaactgggacgggtgtcattcctcaaccgctatc  
tataagcctcgtcctcggtggactggttaagcagcttatcagcatggttatccctaaggag  
gttagcctgttcaacgggtacggattctggcgaaaacgcccctcttaaggacgagggctct  
ctgatccaagccggccaactgatgtatggtcttttaactaagaagaacattgggtgctgct  
gcggggtggtattgtgcatatcagctacaacgaacttggccccgaagggtgcgatggctttc  
ttaaacggtgtccagcaggttgtcacctactggcttctcaacaatggtcatagcattgggt  
attgggtgatacaattcccgatgcggcgaccattgctaaagttcaggtacatattgatgag  
gaaaaggctgaagttgctcgcttgacagcaatggccacagcgaatgagcttgaggcccta  
cctgggtatgaacggttcgtgcaaccttcgaaaacaaagtctccatggctctgaaccaggcc  
cgtgataaggctggtaccacaacacagaagagtttgaaggattcaaacaacgctgtcacc  
atggcttcctcaggttccaagggttcattctatcaatatttctcaaagtactgcgcttgct  
ggtcagcaaatgttggaaggcaagcgatttccttttggtttcaagtatcgacattacct  
catttcaccaaggac

>SP\_FOA19 no comment

gagatgaaccttcacgtccctcagagtgaggaaacgcgcgctgaggttaaagagctttgt  
ctagttcccttgaaacattgtctctcctcagaagaacggtcctttgatgggtatcgccag  
gactctctggctggtgcctacaagctttgccgtcgagatgttttcctcacaaggagcaa  
atcatgaactgtatgctctgggtgccaactgggacgggtgtcattcctcaaccgctatc



```

tataagcctcgtcctcgggtggactggtaagcagcttatcagcatgggttatccctaaggag
gtaggcctgttcaacgggtacggattctggcgaaaacgcccctcttaaggacgagggctctt
ctgatccaagccggccaactgatgtatggtcttttaactaagaagaacattgggtgctgct
gcggggtggtattgtgcatatcagctacaacgaacttggccccgaagggtgcatggccttc
ttaaacgggtgtccagcaggttgtcacctactggcttctcaacaatggtcatagcattgggt
attggtgatacaattcccgatgcggcgaccatttgctaaagttcaggtacatattgatgag
gaaaaggctgaagttgctcgcttgacagcaatggccacagcgaatgagcttgaggcccta
cctggtatgaacggttcgtgcaaccttcgaaaacaaagtctccatggctctgaaccaggcc
cgtgataaggctggtaccacaacacagaagagtttgaaggattcaaacaacgctgtcacc
atggcttcctcaggttccaagggttcatctatcaatatttctcaaatgactgcgcttgctc
ggtcagcaaatgttgaaggcaagcgtattccttttggtttcaagtatcgacattacct
cacttcaccaaggac
>SP_FOA20 no comment
gagatgaaccttcacgtccctcagagtgaaggaaacgcgcgctgagggttaaagagctttgt
ctagttcccttgaacattgtctctcctcagaagaacgggtcctttgatgggtatcgccag
gactctctggctggtgcctacaagctttgccgtcgagatgttttccctcacaaggagcaa
atcatgaactgtatgctctgggtgcccaactgggacgggtgtcattcctcaaccgcctatc
tataagcctcgtcctcgggtggactggtaagcagcttatcagcatgggttatccctaaggag
gtaggcctgttcaacgggtacggattctggcgaaaacgcccctcttaaggacgagggctctt
ctgatccaagccggccaactgatgtatggtcttttaactaagaagaacattgggtgctgct
gcggggtggtattgtgcatatcagctacaacgaacttggccccgaagggtgcatggccttc
ttaaacgggtgtccagcaggttgtcacctactggcttctcaacaatggtcatagcattgggt
attggtgatacaattcccgatgcggcgaccatttgctaaagttcaggtacatattgatgag
gaaaaggctgaagttgctcgcttgacagcaatggccacagcgaatgagcttgaggcccta
cctggtatgaacggttcgtgcaaccttcgaaaacaaagtctccatggctctgaaccaggcc
cgtgataaggctggtaccacaacacagaagagtttgaaggattcaaacaacgctgtcacc
atggcttcctcaggttccaagggttcatctatcaatatttctcaaatgactgcgcttgctc
ggtcagcaaatgttgaaggcaagcgtattccttttggtttcaagtatcgacattacct
cacttcaccaaggac

```

#### S4: NEXUS partition file (annotation of exons/introns in TEF1A; RPB1,RPB2; coding only);

```

#nexus
begin sets;
  charset tef1_exons = SP1_curated_partition_TEF1A.fasta: 185-323
379-408;
  charset tef1_intron1 = SP1_curated_partition_TEF1A.fasta: 1-184;
  charset tef1_intron2 = SP1_curated_partition_TEF1A.fasta: 324-378;
  charset rpb1 = SP2_curated_partition_RPB1.fasta: 1-915;
  charset rpb2 = SP3_curated_partition_RPB2.fasta: 1-853;
  charpartition mine = K2P+R2:tef1_intron1, K2P:tef1_intron2,
TNe+I:rpb1, TNe+I:rpb2;
end;

```

#### S5: Topology of the consensus tree obtained with IQ-TREE (Newick format).

```

(fusarium_proliferatum_et1_gca_900067095:0.1227398786,(((((((fusarium_
oxysporum_fo47_gca_000271705:0.0005105405,GASP_5:0.0039154154)37:0.000
5214953,(((((((GASP_3:0.0000000000,GA_3.2:0.0000000000):0.0000000000
,GA_92.3:0.0000000000):0.0000000000,GA_5.4:0.0000000000):0.0000000000,
SP_FOA02:0.0000000000):0.0000000000,GA_4.2:0.0000000000):0.0000000000,
GA_5.3:0.0000000000):0.0000029556,GASP_9:0.0000029556)39:0.0000029556,
GA_99.2:0.0000029556)59:0.0000029556,GA_1.3:0.0000029556)63:0.00000208
22)24:0.0005062635,(GA_3.6:0.0005131070,((((SP_FOA15:0.0000000000,SP_
FOA20:0.0000000000):0.0000000000,SP_FOA19:0.0000000000):0.0000000000,S
P_FOA18:0.0000000000):0.0000000000,SP_FOA17:0.0000000000):0.0000029556
,SP_FOA16:0.0000029556)97:0.0021059469)62:0.0005196686)31:0.0000024980
,((((GASP_2:0.0000029556,GA_1.2:0.0000029556)38:0.0000029556,(GA_1.4
:0.0000029556,GA_3.5:0.0000029556)41:0.0000029556)74:0.0005079791,(GA_

```

\_10:0.0000029556,((((GA\_3.3:0.0000000000,SP\_FOA01:0.0000000000):0.000000000,SP\_FOA05:0.0000000000):0.0000000000,SP\_FOA03:0.0000000000):0.000000000,SP\_FOA04:0.0000000000):0.0000029556,GA\_3.7:0.0000029556)69:0.0000029556)77:0.0000029556,(GA\_4.1:0.0000029556,GA\_4.3:0.0000029556)97:0.0005085707)90:0.0000029556)85:0.0010269858,SP\_FOA14:0.0000029556)36:0.0005067835,SP\_FOA13:0.0005075787)19:0.0000029556,(NL\_FOA03:0.0000029556,NL\_FOA04:0.0000029556)56:0.0000029556)13:0.0000029556)65:0.0005067744,SP\_FOA10:0.0000029556)67:0.0005067135,SP\_FOA06:0.0000029556)82:0.0006031118,GASP\_4:0.0022766468)86:0.0005408163,((((NL\_FOA01:0.0000029556,NL\_FOA02:0.0000029556)85:0.0000020234,(NL\_FOA05:0.0000020365,SP\_FOA07:0.0021770363)66:0.0010297728)78:0.0005286509,SP\_FOA11:0.0000029556)57:0.0000029556,SP\_FOA12:0.0005068463)77:0.0005073258,SP\_FOA08:0.0000029556)55:0.0005073082,SP\_FOA09:0.0000029556)84:0.0026767472);
